# Supplementary material for: Beauty, the feeling
Source: Research Square preprint supplement (doi:10.21203/rs.3.rs-103908/v1), 2020-11-12
Supplement: Supplementary file 1 [file 78c89fcb6d55e1480e32432b.pdf]

# Beauty, the feeling

Aenne A. Brielmann, Angelica Nuzzo, & Denis G. Pelli

## Supplementary Material

### Data availability

All data, including the full descriptions of remembered beauty our participants provided, and main analyses files for this article are accessible on GitHub:

[https://github.com/aenneb/characterizing\\_beauty](https://github.com/aenneb/characterizing_beauty).

### Generation of questions

All questions that were part of the studies reported here were based on discussions of all three authors, one of which is a distinguished philosophy scholar with particular expertise on Kant's and Hegel's aesthetics (Nuzzo, 2005; 2006). Accordingly, we generated questions based on the following rationale: "What would [Kant / Hegel] ask a person to find out whether she had a genuine beauty experience?". Special additional consideration was given to the positions of Aristotle (Haliwell, 1989), Plato (Denham, 2012), and Hume (Taylor, 2008).

### Verbatim instructions and questions

**General beliefs about beauty questions.** The following questions were shown to participants in all experiments at the end of their respective different surveys.

1. How closely related are the feelings of beauty and pleasure?  
Not at all (1) to Very closely (7)
2. Which is greater, the beauty of art or nature?  
Art (1) to Nature (7)
3. The beauty of an image is...  
Entirely in the image (1) to Entirely in the story the image tells you (7)
4. Are shared experiences of beauty a form of communication?  
Not at all (1) to Very much (7)
5. How much does mood affect the feeling of beauty?  
Not at all (1) to Very much (7)
6. Can you name an object that everyone finds beautiful?  
Yes or No
7. [If yes for 6.] Please name the object(s) that everyone finds beautiful.

**Experiment 1.** The instructions read as follows: “Thank you for participating in our study. In the following, you will answer a series of questions about some images. We will always show you one question and one image at a time.

You will answer all questions on a scale from "not at all" to "very much". You can use either of these extremes or any point in between to indicate a less extreme opinion.

In answering the question, please refer to what you feel and think as you look at the image.

We are interested in your personal opinion. There are no right or wrong answers.”

Afterwards, participants answered each of the following questions for each image, in random order:

1. How much beauty do you feel from looking at this image right now?
2. How much pleasure do you feel from looking at this image right now?
3. Does this image surprise you?
4. Does this image make you want to look at it?
5. As you look at this image, do you feel content, purely contemplative, free of desire?
6. As you look at this image, how alive, excited, do you feel?
7. As you look at this image, do you want to understand it more?
8. As you look at this image, is your mind wandering freely?
9. In how many ways do you feel connected to this image?
10. Does this image tell you a story?
11. Is this image beautiful to everyone?
12. As you look at this image, do you feel longing, unfulfilled desire?

All ratings were given on a (1) Not at all to (7) Very much scale, except for the questions about the number of connections which was answered on a (1) None to (7) scale.

**Experiments 2 -4.** The instructions read as follows: “Please think back to an experience during which you felt intense [Experiment 2-3: beauty; Experiment 4: relief]. Picture the experience. Remember as many details as you can: what you saw, heard, smelled, and felt.

Let the memory linger for a minute.

When you are ready, continue to the next page (you will be able to do so after one minute has elapsed).”

Afterwards, participants answered each of the following questions in random order:

1. How much beauty did you feel during the experience?
2. How much pleasure did you feel during the experience?

3. Did the experience surprise you?
4. Did the experience make you want to experience it for a longer time?
5. As you had the experience, did you feel content, purely contemplative, free of desire?
6. As you had the experience, how alive, excited, did you feel?
7. As you had the experience, did you want to understand it more?
8. As you had the experience, did your mind wander freely?
9. In how many ways did you feel connected to the experience?
10. Did the experience tell you a story?
11. Is the experience [beautiful / a relief] to everyone?
12. As you had the experience, did you feel longing, unfulfilled desire?
13. Did you feel calm and peaceful during the experience?
14. How perfect was this experience?

All ratings were given on a (1) Not at all / none to (7) Very much / many scale.

### **Separate linear mixed-effect models for Experiment 1a**

Of all linear mixed-effects models tested (see **Supplementary Tables S1-13**), one that incorporated random effects of participant and image, as well as the interaction between image category and the eleven non-beauty ratings, explained the highest proportion of rating variance,  $R^2 = 0.77$ . The model effects are listed in **Supplementary Table S1**. The model that performed best according to Bayes Factor was one that incorporated the interaction with gender instead of image category,  $R^2 = 0.76$ , relative performance 82.60% compared to 78.66% for the image category model. The gender model effects are listed in **Supplementary Table S2**. Notably, all

main effects of the other ratings were the same for both models, with the only exception of longing, reaching significance only in the stimulus category model.

Thus, in general, beauty increased with increasing ratings of pleasure, Wish to continue, feeling alive, a feeling that the image is beautiful to everyone, and feeling free of desire. This is equivalent to the findings reported across Experiments 1a and 1b in the main manuscript.

**Table S1. The linear-mixed effects model for Experiment 1a, including stimulus category as an additional factor.**

| Random effects                         |             |             |             |             |                  |
|----------------------------------------|-------------|-------------|-------------|-------------|------------------|
|                                        | Variance    | <i>SD</i>   |             |             |                  |
| Participant                            | 0.04        | 0.21        |             |             |                  |
| Image                                  | 0.004       | 0.07        |             |             |                  |
| Fixed effects                          |             |             |             |             |                  |
|                                        | Estimate    | <i>SE</i>   | <i>df</i>   | <i>t</i>    | <i>p</i>         |
| Intercept                              | 0.22        | 0.15        | 552         | 1.41        | 0.159            |
| <b>Beautiful stock-image (BS)</b>      | <b>0.76</b> | <b>0.24</b> | <b>852</b>  | <b>3.17</b> | <b>0.002</b>     |
| Neutral stock-image (NS)               | -0.32       | 0.20        | 254         | -1.64       | 0.101            |
| <b>Pleasure</b>                        | <b>0.25</b> | <b>0.03</b> | <b>1743</b> | <b>7.28</b> | <b>&lt;0.001</b> |
| <b>Wish to continue</b>                | <b>0.19</b> | <b>0.03</b> | <b>1741</b> | <b>5.74</b> | <b>&lt;0.001</b> |
| <b>Feeling alive</b>                   | <b>0.16</b> | <b>0.03</b> | <b>1596</b> | <b>4.67</b> | <b>&lt;0.001</b> |
| <b>Universality</b>                    | <b>0.12</b> | <b>0.03</b> | <b>1366</b> | <b>3.63</b> | <b>&lt;0.001</b> |
| <b>Number of felt connections</b>      | <b>0.08</b> | <b>0.03</b> | <b>1703</b> | <b>2.61</b> | <b>0.009</b>     |
| <b>Longing</b>                         | <b>0.07</b> | <b>0.03</b> | <b>1701</b> | <b>2.55</b> | <b>0.011</b>     |
| <b>Feeling free of desire</b>          | <b>0.06</b> | <b>0.03</b> | <b>1725</b> | <b>2.06</b> | <b>0.040</b>     |
| Mind-wandering                         | 0.05        | 0.03        | 1724        | 1.56        | 0.120            |
| Surprise                               | -0.04       | 0.02        | 1442        | -1.59       | 0.113            |
| Wanting to understand more             | 0.04        | 0.03        | 1733        | 1.19        | 0.236            |
| Telling a story                        | 0.03        | 0.03        | 1318        | 1.11        | 0.268            |
| BS × pleasure                          | -0.01       | 0.05        | 1721        | -0.25       | 0.805            |
| NS × pleasure                          | 0.03        | 0.06        | 1731        | 0.49        | 0.623            |
| <b>BS × Wish to continue</b>           | <b>0.12</b> | <b>0.05</b> | <b>1743</b> | <b>2.34</b> | <b>0.019</b>     |
| NS × Wish to continue                  | -0.08       | 0.06        | 1714        | -1.46       | 0.144            |
| BS × feeling alive                     | -0.07       | 0.05        | 1716        | -1.51       | 0.132            |
| NS × feeling alive                     | -0.01       | 0.06        | 1731        | -0.18       | 0.860            |
| BS × Universality                      | 0.06        | 0.05        | 1641        | 1.13        | 0.260            |
| NS × Universality                      | 0.06        | 0.05        | 1628        | 1.15        | 0.249            |
| BS × number of felt connections        | -0.06       | 0.04        | 1746        | -1.45       | 0.146            |
| <b>NS × number of felt connections</b> | <b>0.12</b> | <b>0.05</b> | <b>1738</b> | <b>2.28</b> | <b>0.022</b>     |
| BS × longing                           | -0.05       | 0.04        | 1737        | -1.24       | 0.215            |
| NS × longing                           | -0.06       | 0.05        | 1709        | -1.40       | 0.163            |
| BS × feeling free of desire            | -0.05       | 0.04        | 1733        | -1.32       | 0.186            |
| NS × feeling free of desire            | 0.01        | 0.05        | 1736        | 0.15        | 0.880            |
| BS × mind-wandering                    | -0.04       | 0.05        | 1720        | -0.98       | 0.330            |
| NS × mind-wandering                    | 0.00        | 0.04        | 1729        | -0.05       | 0.960            |
| BS × surprise                          | -0.02       | 0.03        | 1641        | -0.50       | 0.620            |
| NS × surprise                          | 0.04        | 0.04        | 1618        | 0.97        | 0.334            |
| BS × wanting to understand more        | 0.01        | 0.04        | 1742        | 0.13        | 0.897            |
| NS × wanting to understand more        | -0.06       | 0.05        | 1707        | -1.15       | 0.250            |
| BS × telling a story                   | -0.02       | 0.04        | 1549        | -0.56       | 0.576            |
| NS × telling a story                   | 0.00        | 0.04        | 303         | 0.02        | 0.984            |

*Notes.* The reference level for image category was the beautiful art image category. Significant fixed effects and interactions are highlighted in bold. The model explained 76.5 % of the variance.

**Table S2. The linear-mixed effects model for Experiment 1a, including gender as additional factor.**

| Random effects                      |              |             |             |              |                  |
|-------------------------------------|--------------|-------------|-------------|--------------|------------------|
|                                     | Variance     | SD          |             |              |                  |
| Participant                         | 0.04         | 0.19        |             |              |                  |
| Image                               | 0.02         | 0.13        |             |              |                  |
| Fixed effects                       |              |             |             |              |                  |
|                                     | Estimate     | SE          | df          | t            | p                |
| <b>Intercept</b>                    | <b>0.37</b>  | <b>0.11</b> | <b>191</b>  | <b>3.32</b>  | <b>0.001</b>     |
| Gender                              | -0.17        | 0.18        | 568         | -0.94        | 0.347            |
| <b>Pleasure</b>                     | <b>0.21</b>  | <b>0.03</b> | <b>1711</b> | <b>7.80</b>  | <b>&lt;0.001</b> |
| <b>Wish to continue</b>             | <b>0.21</b>  | <b>0.03</b> | <b>1613</b> | <b>8.12</b>  | <b>&lt;0.001</b> |
| <b>Feeling alive</b>                | <b>0.18</b>  | <b>0.03</b> | <b>1716</b> | <b>6.63</b>  | <b>&lt;0.001</b> |
| <b>Universality</b>                 | <b>0.18</b>  | <b>0.03</b> | <b>1308</b> | <b>6.93</b>  | <b>&lt;0.001</b> |
| <b>Number of felt connections</b>   | <b>0.09</b>  | <b>0.02</b> | <b>1444</b> | <b>4.05</b>  | <b>&lt;0.001</b> |
| Longing                             | 0.04         | 0.02        | 1320        | 1.86         | 0.064            |
| <b>Feeling free of desire</b>       | <b>0.06</b>  | <b>0.02</b> | <b>1424</b> | <b>2.48</b>  | <b>0.013</b>     |
| Mind-wandering                      | 0.02         | 0.02        | 1693        | 0.92         | 0.357            |
| Surprise                            | -0.02        | 0.02        | 885         | -1.08        | 0.281            |
| Wanting to understand more          | 0.00         | 0.02        | 1584        | 0.18         | 0.855            |
| Telling a story                     | -0.01        | 0.02        | 1031        | -0.53        | 0.596            |
| <b>Gender × pleasure</b>            | <b>0.11</b>  | <b>0.05</b> | <b>1702</b> | <b>2.22</b>  | <b>0.027</b>     |
| <b>Gender × Wish to continue</b>    | <b>0.09</b>  | <b>0.05</b> | <b>1641</b> | <b>2.02</b>  | <b>0.044</b>     |
| <b>Gender × Feeling alive</b>       | <b>-0.13</b> | <b>0.05</b> | <b>1695</b> | <b>-2.85</b> | <b>0.004</b>     |
| Gender × Universality               | 0.00         | 0.05        | 1410        | 0.01         | 0.992            |
| Gender × Number of felt connections | -0.04        | 0.04        | 1460        | -1.06        | 0.291            |
| Gender × Longing                    | -0.03        | 0.04        | 1256        | -0.81        | 0.420            |
| Gender × Feeling free of desire     | -0.04        | 0.04        | 1374        | -0.99        | 0.325            |
| Gender × Mind-wandering             | 0.06         | 0.04        | 1451        | 1.37         | 0.173            |
| Gender × Surprise                   | -0.03        | 0.03        | 1133        | -0.87        | 0.386            |
| Gender × Wanting to understand more | 0.06         | 0.04        | 1643        | 1.58         | 0.115            |
| Gender × Telling a story            | -0.01        | 0.03        | 1602        | -0.24        | 0.810            |

*Notes.* The reference level for gender was male. Significant fixed effects and interactions are highlighted in bold. The model explained 75.6 % of the variance.

**Table S3. The linear-mixed effects model for Experiment 1a, without interactions.**

| Random effects             |          |      |        |      |        |
|----------------------------|----------|------|--------|------|--------|
|                            | Variance | SD   |        |      |        |
| Participant                | 0.05     | 0.21 |        |      |        |
| Image                      | 0.02     | 0.14 |        |      |        |
| Fixed effects              |          |      |        |      |        |
|                            | Estimate | SE   | df     | t    | p      |
| Intercept                  | 0.34     | 0.10 | 134.9  | 3.3  | 0.001  |
| Beautiful stock-image (BS) | 0.26     | 0.02 | 1757.0 | 11.3 | <0.001 |
| Neutral stock-image (NS)   | -0.03    | 0.02 | 1067.0 | -2.1 | 0.036  |
| Pleasure                   | 0.24     | 0.02 | 1633.0 | 10.9 | <0.001 |
| Wish to continue           | 0.13     | 0.02 | 1758.0 | 5.8  | <0.001 |
| Feeling alive              | 0.04     | 0.02 | 1666.0 | 1.9  | 0.063  |
| Universality               | 0.34     | 0.10 | 134.9  | 3.3  | 0.001  |
| Number of felt connections | 0.18     | 0.02 | 1323.0 | 8.1  | <0.001 |
| Longing                    | 0.26     | 0.02 | 1757.0 | 11.3 | <0.001 |
| Feeling free of desire     | 0.02     | 0.02 | 1599.0 | 1.2  | 0.233  |
| Mind-wandering             | -0.01    | 0.02 | 861.6  | -0.5 | 0.645  |
| Surprise                   | 0.04     | 0.02 | 1496.0 | 2.4  | 0.016  |
| Wanting to understand more | 0.08     | 0.02 | 1526.0 | 3.9  | <0.001 |
| Telling a story            | 0.03     | 0.02 | 1377.0 | 1.8  | 0.068  |

*Notes.* The reference level for image category was the beautiful art image category. Significant fixed effects and interactions are highlighted in bold. The model explained 74.8 % of the variance.



**Table S4. The linear-mixed effects model for Experiment 1a, including art education as additional factor.**

| Random effects                                    |              |             |             |              |                  |
|---------------------------------------------------|--------------|-------------|-------------|--------------|------------------|
|                                                   | Variance     | <i>SD</i>   |             |              |                  |
| Participant                                       | 0.05         | 0.22        |             |              |                  |
| Image                                             | 0.02         | 0.14        |             |              |                  |
| Fixed effects                                     |              |             |             |              |                  |
|                                                   | Estimate     | <i>SE</i>   | <i>df</i>   | <i>t</i>     | <i>p</i>         |
| <b>Intercept</b>                                  | <b>0.30</b>  | <b>0.11</b> | <b>163</b>  | <b>2.78</b>  | <b>0.006</b>     |
| Art education                                     | -0.03        | 0.25        | 405         | -0.13        | 0.901            |
| <b>Pleasure</b>                                   | <b>0.26</b>  | <b>0.02</b> | <b>1746</b> | <b>10.61</b> | <b>&lt;0.001</b> |
| <b>Wish to continue</b>                           | <b>0.23</b>  | <b>0.02</b> | <b>1629</b> | <b>10.24</b> | <b>&lt;0.001</b> |
| <b>Feeling alive</b>                              | <b>0.13</b>  | <b>0.02</b> | <b>1742</b> | <b>5.76</b>  | <b>&lt;0.001</b> |
| <b>Universality</b>                               | <b>0.20</b>  | <b>0.02</b> | <b>1343</b> | <b>8.27</b>  | <b>&lt;0.001</b> |
| <b>Number of felt connections</b>                 | <b>0.07</b>  | <b>0.02</b> | <b>1496</b> | <b>3.22</b>  | <b>0.001</b>     |
| Longing                                           | 0.03         | 0.02        | 1354        | 1.54         | 0.124            |
| <b>Feeling free of desire</b>                     | <b>0.05</b>  | <b>0.02</b> | <b>1491</b> | <b>2.35</b>  | <b>0.019</b>     |
| Mind-wandering                                    | 0.03         | 0.02        | 1648        | 1.51         | 0.132            |
| Surprise                                          | -0.02        | 0.02        | 1094        | -1.40        | 0.162            |
| Wanting to understand more                        | 0.02         | 0.02        | 1580        | 1.04         | 0.297            |
| Telling a story                                   | -0.01        | 0.02        | 912         | -0.39        | 0.695            |
| Art education × pleasure                          | -0.03        | 0.07        | 1752        | -0.42        | 0.674            |
| Art education × Wish to continue                  | 0.00         | 0.08        | 1693        | 0.03         | 0.977            |
| Art education × Feeling alive                     | -0.05        | 0.07        | 1741        | -0.79        | 0.428            |
| <b>Art education × Universality</b>               | <b>-0.17</b> | <b>0.07</b> | <b>1685</b> | <b>-2.37</b> | <b>0.018</b>     |
| <b>Art education × Number of felt connections</b> | <b>0.14</b>  | <b>0.07</b> | <b>1746</b> | <b>2.20</b>  | <b>0.028</b>     |
| Art education × Longing                           | 0.05         | 0.06        | 1636        | 0.90         | 0.368            |
| Art education × Feeling free of desire            | 0.01         | 0.07        | 1687        | 0.11         | 0.915            |
| Art education × Mind-wandering                    | 0.05         | 0.06        | 1703        | 0.88         | 0.381            |
| Art education × Surprise                          | -0.05        | 0.05        | 1286        | -1.17        | 0.243            |
| <b>Art education × Wanting to understand more</b> | <b>0.00</b>  | <b>0.06</b> | <b>1743</b> | <b>0.03</b>  | <b>0.978</b>     |
| Art education × Telling a story                   | 0.03         | 0.05        | 1744        | 0.64         | 0.525            |

*Notes.* The reference level for art education was no education. Significant fixed effects and interactions are highlighted in bold. The model explained 75.0 % of the variance.

**Table S5. The linear-mixed effects model for Experiment 1a, including philosophy education as additional factor.**

| Random effects                                           |              |             |             |              |                  |
|----------------------------------------------------------|--------------|-------------|-------------|--------------|------------------|
|                                                          | Variance     | SD          |             |              |                  |
| Participant                                              | 0.05         | 0.21        |             |              |                  |
| Image                                                    | 0.02         | 0.13        |             |              |                  |
| Fixed effects                                            |              |             |             |              |                  |
|                                                          | Estimate     | SE          | df          | t            | p                |
| <b>Intercept</b>                                         | <b>0.30</b>  | <b>0.11</b> | <b>157</b>  | <b>2.81</b>  | <b>0.006</b>     |
| Philosophy education                                     | -0.17        | 0.29        | 421         | -0.60        | 0.547            |
| <b>Pleasure</b>                                          | <b>0.26</b>  | <b>0.02</b> | <b>1739</b> | <b>10.84</b> | <b>&lt;0.001</b> |
| <b>Wish to continue</b>                                  | <b>0.23</b>  | <b>0.02</b> | <b>1629</b> | <b>10.45</b> | <b>&lt;0.001</b> |
| <b>Feeling alive</b>                                     | <b>0.13</b>  | <b>0.02</b> | <b>1742</b> | <b>5.71</b>  | <b>0.000</b>     |
| <b>Universality</b>                                      | <b>0.19</b>  | <b>0.02</b> | <b>1285</b> | <b>8.27</b>  | <b>&lt;0.001</b> |
| <b>Number of felt connections</b>                        | <b>0.07</b>  | <b>0.02</b> | <b>1486</b> | <b>3.45</b>  | <b>0.001</b>     |
| Longing                                                  | 0.03         | 0.02        | 1332        | 1.76         | 0.078            |
| <b>Feeling free of desire</b>                            | <b>0.05</b>  | <b>0.02</b> | <b>1468</b> | <b>2.41</b>  | <b>0.016</b>     |
| Mind-wandering                                           | 0.03         | 0.02        | 1651        | 1.53         | 0.125            |
| Surprise                                                 | -0.02        | 0.02        | 1098        | -1.23        | 0.219            |
| <b>Wanting to understand more</b>                        | 0.02         | 0.02        | 1564        | 1.09         | 0.274            |
| Telling a story                                          | -0.01        | 0.02        | 821         | -0.62        | 0.538            |
| Philosophy education × pleasure                          | -0.08        | 0.08        | 1708        | -1.08        | 0.278            |
| Philosophy education × Wish to continue                  | -0.08        | 0.09        | 1746        | -0.98        | 0.329            |
| Philosophy education × Feeling alive                     | 0.02         | 0.08        | 1738        | 0.23         | 0.820            |
| <b>Philosophy education × Universality</b>               | <b>-0.17</b> | <b>0.08</b> | <b>1749</b> | <b>-2.06</b> | <b>0.039</b>     |
| <b>Philosophy education × Number of felt connections</b> | <b>0.17</b>  | <b>0.08</b> | <b>1743</b> | <b>2.20</b>  | <b>0.028</b>     |
| Philosophy education × Longing                           | 0.03         | 0.06        | 1674        | 0.46         | 0.643            |
| Philosophy education × Feeling free of desire            | 0.03         | 0.07        | 1749        | 0.38         | 0.707            |
| Philosophy education × Mind-wandering                    | 0.05         | 0.07        | 1691        | 0.76         | 0.449            |
| Philosophy education × Surprise                          | -0.07        | 0.05        | 1356        | -1.35        | 0.179            |
| <b>Philosophy education × Wanting to understand more</b> | -0.01        | 0.07        | 1725        | -0.11        | 0.915            |
| Philosophy education × Telling a story                   | 0.11         | 0.06        | 1729        | 1.82         | 0.069            |

*Notes.* The reference level for philosophy education was no education. Significant fixed effects and interactions are highlighted in bold. The model explained 75.1 % of the variance.

**Table S6. The linear-mixed effects model for Experiment 1a, including age as additional predictor.**

| Random effects                    |              |             |             |              |              |
|-----------------------------------|--------------|-------------|-------------|--------------|--------------|
|                                   | Variance     | SD          |             |              |              |
| Participant                       | 0.04         | 0.20        |             |              |              |
| Image                             | 0.02         | 0.15        |             |              |              |
| Fixed effects                     |              |             |             |              |              |
|                                   | Estimate     | SE          | df          | t            | p            |
| Intercept                         | -0.33        | 0.33        | 397         | -1.00        | 0.319        |
| <b>Age</b>                        | <b>0.02</b>  | <b>0.01</b> | <b>369</b>  | <b>2.11</b>  | <b>0.036</b> |
| <b>Pleasure</b>                   | <b>0.42</b>  | <b>0.09</b> | <b>1744</b> | <b>4.75</b>  | <b>0.000</b> |
| <b>Wish to continue</b>           | <b>0.32</b>  | <b>0.09</b> | <b>1745</b> | <b>3.74</b>  | <b>0.000</b> |
| Feeling alive                     | 0.06         | 0.08        | 1734        | 0.75         | 0.453        |
| Universality                      | 0.01         | 0.09        | 1609        | 0.11         | 0.916        |
| Number of felt connections        | -0.02        | 0.07        | 1438        | -0.29        | 0.772        |
| <b>Longing</b>                    | <b>0.16</b>  | <b>0.07</b> | <b>1377</b> | <b>2.34</b>  | <b>0.019</b> |
| Feeling free of desire            | 0.04         | 0.07        | 1385        | 0.65         | 0.516        |
| <b>Mind-wandering</b>             | <b>0.21</b>  | <b>0.07</b> | <b>1685</b> | <b>2.93</b>  | <b>0.003</b> |
| <b>Surprise</b>                   | <b>-0.12</b> | <b>0.06</b> | <b>1007</b> | <b>-2.08</b> | <b>0.038</b> |
| <b>Wanting to understand more</b> | <b>0.15</b>  | <b>0.07</b> | <b>1602</b> | <b>2.23</b>  | <b>0.026</b> |
| <b>Telling a story</b>            | <b>-0.19</b> | <b>0.06</b> | <b>1735</b> | <b>-3.18</b> | <b>0.002</b> |
| <b>Age × pleasure</b>             | <b>0.00</b>  | <b>0.00</b> | <b>1747</b> | <b>-1.89</b> | <b>0.059</b> |
| Age × Wish to continue            | 0.00         | 0.00        | 1742        | -0.98        | 0.330        |
| Age × Feeling alive               | 0.00         | 0.00        | 1745        | 0.76         | 0.450        |
| <b>Age × Universality</b>         | <b>0.00</b>  | <b>0.00</b> | <b>1654</b> | <b>1.98</b>  | <b>0.048</b> |
| Age × Number of felt connections  | 0.00         | 0.00        | 1495        | 1.39         | 0.165        |
| Age × Longing                     | 0.00         | 0.00        | 1413        | -1.95        | 0.051        |
| Age × Feeling free of desire      | 0.00         | 0.00        | 1376        | -0.07        | 0.941        |
| <b>Age × Mind-wandering</b>       | <b>0.00</b>  | <b>0.00</b> | <b>1684</b> | <b>-2.48</b> | <b>0.013</b> |
| Age × Surprise                    | 0.00         | 0.00        | 1056        | 1.58         | 0.115        |
| Age × Wanting to understand more  | 0.00         | 0.00        | 1599        | -1.88        | 0.060        |
| <b>Age × Telling a story</b>      | <b>0.01</b>  | <b>0.00</b> | <b>1740</b> | <b>3.25</b>  | <b>0.001</b> |

*Notes.* Significant fixed effects and interactions are highlighted in bold. The model explained 75.2 % of the variance.

**Table S7. The linear-mixed effects model for Experiment 1a, 1a including political orientation as additional predictor.**

| Random effects                              |              |             |             |              |                  |
|---------------------------------------------|--------------|-------------|-------------|--------------|------------------|
|                                             | Variance     | <i>SD</i>   |             |              |                  |
| Participant                                 | 0.04         | 0.20        |             |              |                  |
| Image                                       | 0.02         | 0.13        |             |              |                  |
| Fixed effects                               |              |             |             |              |                  |
|                                             | Estimate     | <i>SE</i>   | <i>df</i>   | <i>t</i>     | <i>p</i>         |
| Intercept                                   | 0.30         | 0.17        | 393         | 1.82         | 0.069            |
| Conservativism                              | 0.01         | 0.04        | 521         | 0.28         | 0.780            |
| <b>Pleasure</b>                             | <b>0.20</b>  | <b>0.05</b> | <b>1688</b> | <b>4.39</b>  | <b>&lt;0.001</b> |
| <b>Wish to continue</b>                     | <b>0.36</b>  | <b>0.04</b> | <b>1620</b> | <b>8.97</b>  | <b>&lt;0.001</b> |
| Feeling alive                               | 0.04         | 0.04        | 1738        | 0.99         | 0.322            |
| <b>Universality</b>                         | <b>0.20</b>  | <b>0.04</b> | <b>1443</b> | <b>4.57</b>  | <b>&lt;0.001</b> |
| <b>Number of felt connections</b>           | <b>0.10</b>  | <b>0.04</b> | <b>1527</b> | <b>2.56</b>  | <b>0.011</b>     |
| <b>Longing</b>                              | <b>0.08</b>  | <b>0.03</b> | <b>1493</b> | <b>2.24</b>  | <b>0.025</b>     |
| Feeling free of desire                      | 0.01         | 0.04        | 1463        | 0.16         | 0.873            |
| <b>Mind-wandering</b>                       | <b>0.09</b>  | <b>0.04</b> | <b>1666</b> | <b>2.31</b>  | <b>0.021</b>     |
| <b>Surprise</b>                             | <b>-0.09</b> | <b>0.03</b> | <b>1383</b> | <b>-2.73</b> | <b>0.006</b>     |
| Wanting to understand more                  | 0.00         | 0.03        | 1742        | -0.11        | 0.915            |
| Telling a story                             | 0.00         | 0.03        | 1474        | -0.08        | 0.940            |
| Conservativism × pleasure                   | 0.02         | 0.01        | 1697        | 1.42         | 0.155            |
| <b>Conservativism × Wish to continue</b>    | <b>-0.04</b> | <b>0.01</b> | <b>1634</b> | <b>-3.80</b> | <b>&lt;0.001</b> |
| <b>Conservativism × Feeling alive</b>       | <b>0.03</b>  | <b>0.01</b> | <b>1748</b> | <b>2.17</b>  | <b>0.030</b>     |
| Conservativism × Universality               | -0.01        | 0.01        | 1584        | -0.52        | 0.605            |
| Conservativism × Number of felt connections | 0.00         | 0.01        | 1553        | -0.42        | 0.674            |
| Conservativism × Longing                    | -0.01        | 0.01        | 1537        | -1.62        | 0.107            |
| Conservativism × Feeling free of desire     | 0.01         | 0.01        | 1532        | 1.09         | 0.277            |
| Conservativism × Mind-wandering             | -0.02        | 0.01        | 1638        | -1.69        | 0.092            |
| <b>Conservativism × Surprise</b>            | <b>0.02</b>  | <b>0.01</b> | <b>1404</b> | <b>2.14</b>  | <b>0.033</b>     |
| Conservativism × Wanting to understand more | 0.01         | 0.01        | 1749        | 1.20         | 0.232            |
| Conservativism × Telling a story            | 0.00         | 0.01        | 1655        | -0.31        | 0.759            |

*Notes.* The reference level for image category was the beautiful art image category. Political orientation was measured on a strong liberal (1) to strong conservative (7) scale. Significant fixed effects and interactions are highlighted in bold. The model explained 75.2 % of the variance.

**Table S8. The linear-mixed effects model for Experiment 1a, including the general beauty attitude question “How closely related are the feelings of beauty and pleasure?” as additional predictor.**

| Random effects                   |              |             |             |              |                  |
|----------------------------------|--------------|-------------|-------------|--------------|------------------|
|                                  | Variance     | <i>SD</i>   |             |              |                  |
| Participant                      | 0.05         | 0.22        |             |              |                  |
| Image                            | 0.02         | 0.14        |             |              |                  |
| Fixed effects                    |              |             |             |              |                  |
|                                  | Estimate     | <i>SE</i>   | <i>df</i>   | <i>t</i>     | <i>p</i>         |
| Intercept                        | -0.08        | 0.36        | 388         | -0.22        | 0.823            |
| Closeness beauty pleasure (CBP)  | 0.07         | 0.06        | 399         | 1.14         | 0.256            |
| <b>Pleasure</b>                  | <b>0.46</b>  | <b>0.10</b> | <b>1722</b> | <b>4.38</b>  | <b>&lt;0.001</b> |
| <b>Wish to continue</b>          | <b>0.38</b>  | <b>0.08</b> | <b>1633</b> | <b>4.53</b>  | <b>&lt;0.001</b> |
| Feeling alive                    | 0.08         | 0.10        | 1728        | 0.82         | 0.413            |
| Universality                     | 0.11         | 0.09        | 1497        | 1.14         | 0.253            |
| Number of felt connections       | -0.04        | 0.08        | 1145        | -0.55        | 0.585            |
| Longing                          | -0.02        | 0.08        | 1425        | -0.21        | 0.836            |
| Feeling free of desire           | 0.06         | 0.08        | 1673        | 0.66         | 0.508            |
| Mind-wandering                   | 0.01         | 0.09        | 1657        | 0.13         | 0.897            |
| Surprise                         | 0.08         | 0.08        | 1268        | 0.98         | 0.326            |
| Wanting to understand more       | -0.05        | 0.08        | 1737        | -0.63        | 0.530            |
| Telling a story                  | 0.02         | 0.07        | 1244        | 0.24         | 0.810            |
| <b>CBP × pleasure</b>            | <b>-0.04</b> | <b>0.02</b> | <b>1730</b> | <b>-2.01</b> | <b>0.045</b>     |
| CBP × Wish to continue           | -0.03        | 0.02        | 1619        | -1.82        | 0.070            |
| CBP × Feeling alive              | 0.01         | 0.02        | 1729        | 0.48         | 0.628            |
| CBP × Universality               | 0.01         | 0.02        | 1454        | 0.82         | 0.412            |
| CBP × Number of felt connections | 0.02         | 0.01        | 1270        | 1.59         | 0.111            |
| CBP × Longing                    | 0.01         | 0.01        | 1493        | 0.67         | 0.501            |
| CBP × Feeling free of desire     | 0.00         | 0.02        | 1652        | -0.14        | 0.890            |
| CBP × Mind-wandering             | 0.00         | 0.02        | 1664        | 0.27         | 0.787            |
| CBP × Surprise                   | -0.02        | 0.01        | 1307        | -1.37        | 0.172            |
| CBP × Wanting to understand more | 0.01         | 0.01        | 1745        | 0.91         | 0.361            |
| CBP × Telling a story            | 0.00         | 0.01        | 1349        | -0.30        | 0.765            |

*Notes.* Significant fixed effects and interactions are highlighted in bold. The model explained 75.0 % of the variance.

**Table S9. The linear-mixed effects model for Experiment 1a, including the general beauty attitude question “Which is greater, the beauty of art or nature?” as additional predictor.**

| Random effects                                    |              |             |             |              |              |
|---------------------------------------------------|--------------|-------------|-------------|--------------|--------------|
|                                                   | Variance     | <i>SD</i>   |             |              |              |
| Participant                                       | 0.04         | 0.21        |             |              |              |
| Image                                             | 0.02         | 0.14        |             |              |              |
| Fixed effects                                     |              |             |             |              |              |
|                                                   | Estimate     | <i>SE</i>   | <i>df</i>   | <i>t</i>     | <i>p</i>     |
| Intercept                                         | 0.58         | 0.33        | 424         | 1.73         | 0.084        |
| Art or nature                                     | -0.04        | 0.06        | 418         | -0.76        | 0.449        |
| Pleasure                                          | 0.09         | 0.09        | 1744        | 0.98         | 0.325        |
| <b>Wish to continue</b>                           | <b>0.19</b>  | <b>0.08</b> | <b>1713</b> | <b>2.31</b>  | <b>0.021</b> |
| Feeling alive                                     | 0.16         | 0.08        | 1749        | 1.95         | 0.051        |
| Universality                                      | 0.10         | 0.08        | 1704        | 1.21         | 0.228        |
| <b>Number of felt connections</b>                 | <b>0.23</b>  | <b>0.08</b> | <b>1489</b> | <b>2.90</b>  | <b>0.004</b> |
| Longing                                           | 0.08         | 0.07        | 1426        | 1.21         | 0.226        |
| Feeling free of desire                            | 0.05         | 0.08        | 1541        | 0.69         | 0.493        |
| Mind-wandering                                    | 0.09         | 0.08        | 1625        | 1.11         | 0.270        |
| Surprise                                          | 0.00         | 0.06        | 1196        | -0.08        | 0.940        |
| Wanting to understand more                        | -0.03        | 0.07        | 1635        | -0.45        | 0.653        |
| Telling a story                                   | -0.01        | 0.06        | 1538        | -0.19        | 0.846        |
| <b>Art or nature × pleasure</b>                   | <b>0.03</b>  | <b>0.02</b> | <b>1742</b> | <b>2.05</b>  | <b>0.041</b> |
| Art or nature × Wish to continue                  | 0.01         | 0.01        | 1713        | 0.58         | 0.560        |
| Art or nature × Feeling alive                     | -0.01        | 0.01        | 1741        | -0.44        | 0.662        |
| Art or nature × Universality                      | 0.02         | 0.01        | 1707        | 1.00         | 0.317        |
| <b>Art or nature × Number of felt connections</b> | <b>-0.03</b> | <b>0.01</b> | <b>1473</b> | <b>-1.98</b> | <b>0.048</b> |
| Art or nature × Longing                           | -0.01        | 0.01        | 1427        | -0.79        | 0.429        |
| Art or nature × Feeling free of desire            | 0.00         | 0.01        | 1535        | -0.11        | 0.916        |
| Art or nature × Mind-wandering                    | -0.01        | 0.01        | 1638        | -0.68        | 0.500        |
| Art or nature × Surprise                          | 0.00         | 0.01        | 1247        | -0.44        | 0.658        |
| <b>Art or nature × Wanting to understand more</b> | <b>0.01</b>  | <b>0.01</b> | <b>1671</b> | <b>0.78</b>  | <b>0.438</b> |
| Art or nature × Telling a story                   | 0.00         | 0.01        | 1562        | 0.08         | 0.934        |

*Notes.* The reference level for image category was the beautiful art image category. Significant fixed effects and interactions are highlighted in bold. The model explained 74.9 % of the variance.

**Table S10. The linear-mixed effects model for Experiment 1a, including the general beauty attitude question “The beauty of an image is...” entirely in the image (1) to entirely in the story (7) as additional predictor.**

| Random effects                              |              |             |             |              |                  |
|---------------------------------------------|--------------|-------------|-------------|--------------|------------------|
|                                             | Variance     | SD          |             |              |                  |
| Participant                                 | 0.05         | 0.21        |             |              |                  |
| Image                                       | 0.02         | 0.14        |             |              |                  |
| Fixed effects                               |              |             |             |              |                  |
|                                             | Estimate     | SE          | df          | t            | p                |
| <b>Intercept</b>                            | <b>0.69</b>  | <b>0.28</b> | <b>481</b>  | <b>2.42</b>  | <b>0.016</b>     |
| Image vs story                              | -0.09        | 0.07        | 481         | -1.33        | 0.186            |
| <b>Pleasure</b>                             | <b>0.30</b>  | <b>0.08</b> | <b>1748</b> | <b>3.97</b>  | <b>&lt;0.001</b> |
| <b>Wish to continue</b>                     | <b>0.32</b>  | <b>0.07</b> | <b>1748</b> | <b>4.66</b>  | <b>&lt;0.001</b> |
| Feeling alive                               | 0.11         | 0.08        | 1742        | 1.44         | 0.150            |
| Universality                                | 0.11         | 0.07        | 1619        | 1.56         | 0.119            |
| Number of felt connections                  | 0.04         | 0.07        | 1470        | 0.66         | 0.508            |
| Longing                                     | 0.01         | 0.06        | 1347        | 0.23         | 0.820            |
| Feeling free of desire                      | 0.03         | 0.07        | 1692        | 0.49         | 0.627            |
| Mind-wandering                              | 0.04         | 0.07        | 1634        | 0.56         | 0.576            |
| Surprise                                    | -0.04        | 0.06        | 1595        | -0.69        | 0.488            |
| Wanting to understand more                  | 0.09         | 0.07        | 1747        | 1.38         | 0.168            |
| <b>Telling a story</b>                      | <b>-0.12</b> | <b>0.06</b> | <b>1515</b> | <b>-1.97</b> | <b>0.049</b>     |
| Image vs story × pleasure                   | -0.01        | 0.02        | 1740        | -0.65        | 0.518            |
| Image vs story × Wish to continue           | -0.02        | 0.02        | 1752        | -1.40        | 0.162            |
| Image vs story × Feeling alive              | 0.01         | 0.02        | 1734        | 0.34         | 0.737            |
| Image vs story × Universality               | 0.02         | 0.02        | 1713        | 0.98         | 0.327            |
| Image vs story × Number of felt connections | 0.01         | 0.02        | 1553        | 0.58         | 0.562            |
| Image vs story × Longing                    | 0.00         | 0.02        | 1399        | 0.33         | 0.740            |
| Image vs story × Feeling free of desire     | 0.00         | 0.02        | 1657        | 0.12         | 0.901            |
| Image vs story × Mind-wandering             | 0.00         | 0.02        | 1665        | -0.12        | 0.903            |
| Image vs story × Surprise                   | 0.00         | 0.01        | 1636        | 0.19         | 0.853            |
| Image vs story × Telling a story            | 0.03         | 0.01        | 1557        | 1.95         | 0.052            |

*Notes.* Significant fixed effects and interactions are highlighted in bold. The model explained 74.9 % of the variance.

**Table S11. The linear-mixed effects model for Experiment 1a, including the general beauty attitude question “Are shared experiences of beauty a form of communication?” as additional predictor.**

| Random effects                             |             |             |             |             |                  |
|--------------------------------------------|-------------|-------------|-------------|-------------|------------------|
|                                            | Variance    | <i>SD</i>   |             |             |                  |
| Participant                                | 0.04        | 0.21        |             |             |                  |
| Image                                      | 0.02        | 0.14        |             |             |                  |
| Fixed effects                              |             |             |             |             |                  |
|                                            | Estimate    | <i>SE</i>   | <i>df</i>   | <i>t</i>    | <i>p</i>         |
| Intercept                                  | 0.27        | 0.31        | 347         | 0.90        | 0.371            |
| Communication                              | 0.02        | 0.05        | 358         | 0.29        | 0.774            |
| <b>Pleasure</b>                            | <b>0.27</b> | <b>0.09</b> | <b>1745</b> | <b>2.86</b> | <b>0.004</b>     |
| <b>Wish to continue</b>                    | <b>0.31</b> | <b>0.07</b> | <b>1588</b> | <b>4.18</b> | <b>&lt;0.001</b> |
| Feeling alive                              | 0.03        | 0.09        | 1735        | 0.32        | 0.749            |
| Universality                               | 0.09        | 0.09        | 1692        | 1.08        | 0.281            |
| <b>Number of felt connections</b>          | <b>0.16</b> | <b>0.08</b> | <b>1130</b> | <b>2.10</b> | <b>0.036</b>     |
| Longing                                    | 0.13        | 0.07        | 1527        | 1.78        | 0.076            |
| <b>Feeling free of desire</b>              | <b>0.17</b> | <b>0.08</b> | <b>1700</b> | <b>2.09</b> | <b>0.036</b>     |
| Mind-wandering                             | -0.04       | 0.08        | 1649        | -0.55       | 0.585            |
| Surprise                                   | -0.02       | 0.07        | 1072        | -0.26       | 0.798            |
| <b>Wanting to understand more</b>          | -0.04       | 0.07        | 1683        | -0.61       | 0.545            |
| Telling a story                            | -0.08       | 0.06        | 1369        | -1.27       | 0.206            |
| Communication × pleasure                   | 0.00        | 0.02        | 1747        | -0.08       | 0.939            |
| Communication × Wish to continue           | -0.01       | 0.01        | 1609        | -1.06       | 0.288            |
| Communication × Feeling alive              | 0.02        | 0.02        | 1737        | 1.15        | 0.249            |
| Communication × Universality               | 0.02        | 0.02        | 1677        | 1.01        | 0.314            |
| Communication × Number of felt connections | -0.02       | 0.01        | 1172        | -1.13       | 0.258            |
| Communication × Longing                    | -0.02       | 0.01        | 1473        | -1.41       | 0.159            |
| Communication × Feeling free of desire     | -0.02       | 0.01        | 1624        | -1.56       | 0.118            |
| Communication × Mind-wandering             | 0.01        | 0.01        | 1647        | 0.98        | 0.326            |
| Communication × Surprise                   | 0.00        | 0.01        | 1087        | -0.22       | 0.827            |
| Communication × Wanting to understand more | 0.01        | 0.01        | 1671        | 1.02        | 0.310            |
| Communication × Telling a story            | 0.01        | 0.01        | 1333        | 1.14        | 0.257            |

*Notes.* The reference level for image category was the beautiful art image category. Significant fixed effects and interactions are highlighted in bold. The model explained 74.9 % of the variance.



**Table S12. The linear-mixed effects model for Experiment 1a, including the general beauty attitude question “How much does mood affect the feeling of beauty?” as additional predictor.**

| Random effects                    |             |             |             |             |              |
|-----------------------------------|-------------|-------------|-------------|-------------|--------------|
|                                   | Variance    | <i>SD</i>   |             |             |              |
| Participant                       | 0.04        | 0.21        |             |             |              |
| Image                             | 0.02        | 0.14        |             |             |              |
| Fixed effects                     |             |             |             |             |              |
|                                   | Estimate    | <i>SE</i>   | <i>df</i>   | <i>t</i>    | <i>p</i>     |
| Intercept                         | 0.02        | 0.40        | 572         | 0.05        | 0.964        |
| Mood                              | 0.05        | 0.07        | 555         | 0.82        | 0.415        |
| Pleasure                          | 0.04        | 0.12        | 1750        | 0.33        | 0.740        |
| Wish to continue                  | 0.13        | 0.11        | 1675        | 1.19        | 0.234        |
| <b>Feeling alive</b>              | <b>0.29</b> | <b>0.11</b> | <b>1747</b> | <b>2.69</b> | <b>0.007</b> |
| <b>Universality</b>               | <b>0.23</b> | <b>0.10</b> | <b>1712</b> | <b>2.21</b> | <b>0.028</b> |
| Number of felt connections        | 0.12        | 0.09        | 1418        | 1.33        | 0.184        |
| Longing                           | 0.13        | 0.09        | 1664        | 1.45        | 0.148        |
| Feeling free of desire            | 0.13        | 0.10        | 1606        | 1.35        | 0.178        |
| Mind-wandering                    | -0.01       | 0.10        | 1738        | -0.15       | 0.880        |
| Surprise                          | 0.04        | 0.08        | 1114        | 0.48        | 0.630        |
| Wanting to understand more        | 0.02        | 0.09        | 1666        | 0.17        | 0.867        |
| Telling a story                   | -0.06       | 0.08        | 1565        | -0.79       | 0.431        |
| Mood × pleasure                   | 0.04        | 0.02        | 1751        | 1.78        | 0.075        |
| Mood × Wish to continue           | 0.02        | 0.02        | 1676        | 0.93        | 0.353        |
| Mood × Feeling alive              | -0.03       | 0.02        | 1747        | -1.55       | 0.122        |
| Mood × Universality               | -0.01       | 0.02        | 1661        | -0.39       | 0.693        |
| Mood × Number of felt connections | -0.01       | 0.02        | 1411        | -0.55       | 0.583        |
| Mood × Longing                    | -0.02       | 0.01        | 1646        | -1.13       | 0.260        |
| Mood × Feeling free of desire     | -0.01       | 0.02        | 1584        | -0.88       | 0.378        |
| Mood × Mind-wandering             | 0.01        | 0.02        | 1737        | 0.51        | 0.611        |
| Mood × Surprise                   | -0.01       | 0.01        | 1065        | -0.87       | 0.383        |
| Mood × Wanting to understand more | 0.00        | 0.02        | 1665        | 0.09        | 0.930        |
| Mood × Telling a story            | 0.01        | 0.01        | 1562        | 0.65        | 0.517        |

*Notes.* The reference level for image category was the beautiful art image category. Significant fixed effects and interactions are highlighted in bold. The model explained 74.8 % of the variance.

**Table S13. The linear-mixed effects model for Experiment 1a, including the general beauty attitude question “Can you name an object that everyone finds beautiful?” as additional predictor.**

| Random effects                     |             |             |             |             |                  |
|------------------------------------|-------------|-------------|-------------|-------------|------------------|
|                                    | Variance    | SD          |             |             |                  |
| Participant                        | 0.04        | 0.21        |             |             |                  |
| Image                              | 0.02        | 0.13        |             |             |                  |
| Fixed effects                      |             |             |             |             |                  |
|                                    | Estimate    | SE          | df          | t           | p                |
| Intercept                          | 0.17        | 0.14        | 293         | 1.24        | 0.217            |
| Universally beautiful object (UBO) | 0.24        | 0.17        | 596         | 1.40        | 0.163            |
| <b>Pleasure</b>                    | <b>0.23</b> | <b>0.03</b> | <b>1753</b> | <b>6.88</b> | <b>&lt;0.001</b> |
| <b>Wish to continue</b>            | <b>0.21</b> | <b>0.03</b> | <b>1710</b> | <b>6.26</b> | <b>&lt;0.001</b> |
| <b>Feeling alive</b>               | <b>0.11</b> | <b>0.03</b> | <b>1747</b> | <b>3.36</b> | <b>0.001</b>     |
| <b>Universality</b>                | <b>0.22</b> | <b>0.03</b> | <b>1693</b> | <b>6.50</b> | <b>&lt;0.001</b> |
| <b>Number of felt connections</b>  | <b>0.10</b> | <b>0.03</b> | <b>1566</b> | <b>3.40</b> | <b>0.001</b>     |
| Longing                            | 0.04        | 0.03        | 1322        | 1.52        | 0.130            |
| Feeling free of desire             | 0.03        | 0.03        | 1371        | 1.25        | 0.213            |
| Mind-wandering                     | 0.03        | 0.03        | 1656        | 0.92        | 0.358            |
| Surprise                           | -0.03       | 0.02        | 1094        | -1.17       | 0.243            |
| Wanting to understand more         | 0.03        | 0.03        | 1693        | 1.16        | 0.245            |
| Telling a story                    | 0.01        | 0.03        | 1518        | 0.23        | 0.817            |
| UBO × pleasure                     | 0.05        | 0.05        | 1744        | 1.00        | 0.315            |
| UBO × Wish to continue             | 0.04        | 0.04        | 1660        | 0.92        | 0.358            |
| UBO × Feeling alive                | 0.03        | 0.04        | 1736        | 0.69        | 0.491            |
| UBO × Universality                 | -0.07       | 0.04        | 1572        | -1.57       | 0.116            |
| UBO × Number of felt connections   | -0.04       | 0.04        | 1506        | -0.97       | 0.334            |
| UBO × Longing                      | -0.02       | 0.04        | 1318        | -0.53       | 0.598            |
| UBO × Feeling free of desire       | 0.02        | 0.04        | 1454        | 0.54        | 0.592            |
| UBO × Mind-wandering               | 0.01        | 0.04        | 1652        | 0.17        | 0.864            |
| UBO × Surprise                     | -0.01       | 0.03        | 1138        | -0.18       | 0.854            |
| UBO × Wanting to understand more   | -0.02       | 0.04        | 1694        | -0.55       | 0.586            |
| UBO × Telling a story              | -0.02       | 0.03        | 1643        | -0.56       | 0.574            |

*Notes.* The reference level for universal beauty was “yes”. Significant fixed effects and interactions are highlighted in bold. The model explained 74.8 % of the variance.

### **Additional analyses for Experiment 1a**

Since Menninghaus and colleagues (2019a) also employed an unpleasant-pleasant scale in their study asking people about their conception of beauty with the same 1-7 range we used, and their data is openly accessible, we compared the ratings given by our and their participants to increase the generalizability of our results. From our data, we used trials of stimuli with a beauty rating of 6 or 7. Pleasure ratings for the concept beauty in Menninghaus and colleagues' study and our data for beautiful images were no different,  $p = 0.325$ ,  $MD = 0.14$ , 95% CI [-0.14, 0.43]. This underlines the stable association between high pleasure and beauty.

Apart from these general patterns, we also examined whether distinct groups of participants exhibited different correlational patterns between beauty and the other ratings. To do so, we performed k-means cluster analyses on the correlation coefficients for each other rating with beauty ratings per participant. We evaluated cluster sizes ranging from one to ten based on the total sum of distances. A clear break in the reduction of the total sum of distances (from  $\geq 17.7$  to  $\leq 6.2$ ) happened at three clusters. Thus, there were three distinct groups of participants with different correlation patterns; their patterns are illustrated in **Figure S1**.

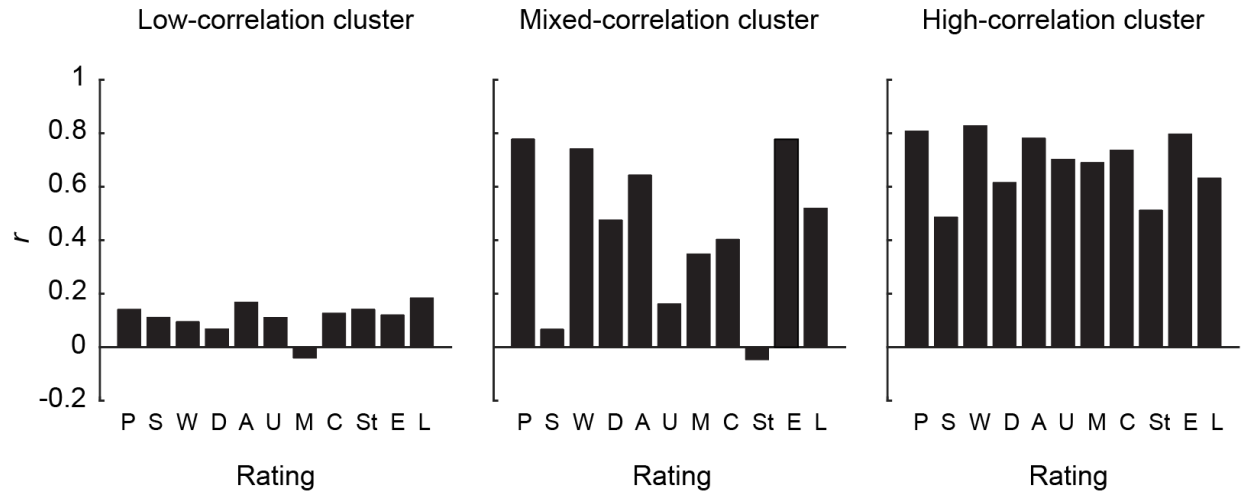

*Figure S1.* Pattern of correlation coefficients for each participant cluster as determined by k-means cluster analyses. P = pleasure, S = surprise, W = wanting to look longer, D = feeling free of desire, A = feeling alive, U = wanting to understand more, M = mind-wandering, C = number of felt connections, St = telling a story, E = beautiful to everyone, L = longing.

The first cluster ( $N = 14$ ) exhibited consistently low correlations between beauty and all other ratings. The second cluster ( $N = 34$ ) showed a mixed pattern of correlations similar to the overall observed relation between beauty and other ratings using linear mixed-effects modeling. In the third cluster ( $N = 46$ ), all correlations were moderately or highly positive.

To gain a better understanding of these different participant clusters, we tested on which demographic and general beauty belief questions the clusters differed. Gender did not differ, all  $p \geq 0.239$ , nor did the proportion of Caucasian individuals, all  $p \geq 0.059$ , nor age, all  $p \geq 0.889$ , nor political orientation, all  $p \geq 0.085$ , nor income, all  $p \geq 0.218$ , nor general education, all  $p \geq 0.409$ , nor art education, all  $p \geq 0.093$ , nor philosophy education, all  $p \geq 0.093$ . However, the proportion of participants in the mixed-correlation cluster that stated that there was a universally beautiful object was lower (27%) than in the high-correlation cluster (56%),  $\text{Chi}(1) = 5.62$ ,  $p = 0.018$ . The mixed-correlation cluster also stated that beauty and pleasure were less closely related,  $M = 5.00$  on a 1-7 scale, than both other clusters, both  $p \leq 0.026$ .

Clusters did not differ in their response to whether art or nature is more beautiful, all  $p \geq 0.086$ , how much a story matters for beauty, all  $p \geq 0.187$ , whether beauty is a form of communication, all  $p \geq 0.079$ , and how much mood affects beauty, all  $p \geq 0.551$ .

### **Separate linear models for Experiment 1b**

Of all linear mixed-effects models tested (see **Supplemental Tables S14-X**), one that incorporated random effects of participant and stimulus, as well as the interaction between stimulus category and the eleven non-beauty ratings, predicted beauty ratings best,  $R^2 = 0.73$ , performance 81.64%, all remaining performances  $\leq 80.88\%$ . The model effects for this best model are listed in **Supplemental Table S14**. Beauty ratings were, on average, 1.23 points lower for songs than for images. Beauty generally increased with increasing ratings of pleasure, Wish to continue, a feeling that the image is beautiful to everyone, feeling free of desire, and mind-wandering. The increase of beauty with increasing mind-wandering was the only effect observed in Experiment 1b but not Experiment 1a. In addition, we saw a greater increase in beauty with an increasing wish to continue the experience for images. In contrast, beauty increased more with increasing ratings of that stimulus being beautiful for everyone for songs compared to images. Ratings of longing and of the extent to which the stimulus tells a story are related positively with beauty ratings for songs only, not for images.

**Table S14. The mixed-effects model that best predicts rated beauty in Experiment 1b.**

| Random effects                    |              |             |              |              |                  |
|-----------------------------------|--------------|-------------|--------------|--------------|------------------|
|                                   | Variance     | <i>SD</i>   |              |              |                  |
| Participant                       | 0.10         | 0.31        |              |              |                  |
| Stimulus                          | 0.02         | 0.14        |              |              |                  |
| Fixed effects                     |              |             |              |              |                  |
|                                   | Estimate     | <i>SE</i>   | <i>df</i>    | <i>t</i>     | <i>p</i>         |
| <b>(Intercept)</b>                | <b>0.93</b>  | <b>0.28</b> | <b>385.0</b> | <b>3.32</b>  | <b>0.001</b>     |
| <b>Song</b>                       | <b>-1.23</b> | <b>0.34</b> | <b>266.2</b> | <b>-3.63</b> | <b>&lt;0.001</b> |
| <b>Pleasure*</b>                  | <b>0.21</b>  | <b>0.05</b> | <b>822.1</b> | <b>4.40</b>  | <b>&lt;0.001</b> |
| <b>Wish to continue*</b>          | <b>0.26</b>  | <b>0.05</b> | <b>848.2</b> | <b>5.49</b>  | <b>&lt;0.001</b> |
| Feeling alive                     | 0.07         | 0.05        | 854.6        | 1.55         | 0.121            |
| <b>Universality*</b>              | <b>0.13</b>  | <b>0.05</b> | <b>799.6</b> | <b>2.78</b>  | <b>0.006</b>     |
| Number of felt connections        | 0.03         | 0.04        | 822.5        | 0.59         | 0.557            |
| Longing                           | -0.03        | 0.04        | 808.8        | -0.88        | 0.377            |
| <b>Feeling free of desire*</b>    | <b>0.14</b>  | <b>0.04</b> | <b>803.5</b> | <b>3.50</b>  | <b>&lt;0.001</b> |
| <b>Mind-wandering</b>             | <b>0.10</b>  | <b>0.04</b> | <b>788.2</b> | <b>2.37</b>  | <b>0.018</b>     |
| Surprise                          | 0.00         | 0.03        | 800.3        | 0.04         | 0.969            |
| Wanting to understand more        | 0.03         | 0.04        | 821.7        | 0.70         | 0.483            |
| Telling a story                   | -0.07        | 0.04        | 799.8        | -1.79        | 0.075            |
| Song × pleasure                   | -0.05        | 0.05        | 852.1        | -1.00        | 0.320            |
| <b>Song × Wish to continue</b>    | <b>0.20</b>  | <b>0.06</b> | <b>834.3</b> | <b>3.30</b>  | <b>0.001</b>     |
| Song × feeling alive              | -0.12        | 0.06        | 845.3        | -1.89        | 0.060            |
| <b>Song × Universality</b>        | <b>-0.19</b> | <b>0.06</b> | <b>855.6</b> | <b>-3.01</b> | <b>0.003</b>     |
| Song × number of felt connections | 0.05         | 0.06        | 857.6        | 0.98         | 0.329            |
| Song × longing                    | -0.08        | 0.05        | 835.4        | -1.40        | 0.163            |
| Song × feeling free of desire     | 0.06         | 0.05        | 850.1        | 1.31         | 0.192            |
| Song × mind-wandering             | -0.07        | 0.06        | 790.6        | -1.23        | 0.219            |
| Song × surprise                   | 0.05         | 0.06        | 848.1        | 0.78         | 0.436            |

|                                          |             |             |              |             |              |
|------------------------------------------|-------------|-------------|--------------|-------------|--------------|
| <b>Song × wanting to understand more</b> | <b>0.17</b> | <b>0.05</b> | <b>838.5</b> | <b>3.28</b> | <b>0.001</b> |
| <b>Song × telling a story</b>            | <b>0.15</b> | <b>0.05</b> | <b>692.6</b> | <b>2.89</b> | <b>0.004</b> |

*Notes.* The reference level for stimulus category was image. Significant fixed effects and interactions are highlighted in bold. The model explained 73 % of the variance. \*Main effect is present in Experiment 1a and 1b.

**Table S15. The linear-mixed effects model for Experiment 1b, including gender as additional factor.**

| Random effects                      |              |             |              |              |                  |
|-------------------------------------|--------------|-------------|--------------|--------------|------------------|
|                                     | Variance     | SD          |              |              |                  |
| Participant                         | 0.1          | 0.32        |              |              |                  |
| Image                               | 0.2          | 0.47        |              |              |                  |
| Fixed effects                       |              |             |              |              |                  |
|                                     | Estimate     | SE          | df           | t            | p                |
| Intercept                           | -0.13        | 0.51        | 402.4        | -0.25        | 0.804            |
| Gender                              | 0.35         | 0.31        | 559.4        | 1.13         | 0.258            |
| Pleasure                            | 0.14         | 0.11        | 825.9        | 1.32         | 0.186            |
| <b>Wish to continue</b>             | <b>0.22</b>  | <b>0.10</b> | <b>849.9</b> | <b>2.26</b>  | <b>0.024</b>     |
| Feeling alive                       | 0.08         | 0.09        | 849.7        | 0.89         | 0.372            |
| <b>Universality</b>                 | <b>0.30</b>  | <b>0.09</b> | <b>790.8</b> | <b>3.35</b>  | <b>0.001</b>     |
| Number of felt connections          | 0.05         | 0.10        | 778.1        | 0.48         | 0.630            |
| Longing                             | -0.13        | 0.09        | 641.0        | -1.47        | 0.143            |
| Feeling free of desire              | 0.03         | 0.08        | 843.9        | 0.36         | 0.718            |
| <b>Mind-wandering</b>               | <b>0.35</b>  | <b>0.08</b> | <b>760.0</b> | <b>4.29</b>  | <b>&lt;0.001</b> |
| Surprise                            | -0.05        | 0.08        | 753.5        | -0.69        | 0.491            |
| Wanting to understand more          | 0.03         | 0.09        | 832.7        | 0.33         | 0.745            |
| Telling a story                     | -0.01        | 0.08        | 852.1        | -0.12        | 0.905            |
| Gender × pleasure                   | 0.00         | 0.07        | 803.1        | -0.01        | 0.990            |
| Gender × Wish to continue           | -0.02        | 0.06        | 847.9        | -0.38        | 0.701            |
| Gender × Feeling alive              | -0.04        | 0.06        | 848.5        | -0.74        | 0.461            |
| Gender × Universality               | -0.02        | 0.06        | 780.4        | -0.35        | 0.727            |
| Gender × Number of felt connections | 0.01         | 0.07        | 774.4        | 0.14         | 0.891            |
| Gender × Longing                    | 0.11         | 0.06        | 729.8        | 1.93         | 0.055            |
| Gender × Feeling free of desire     | 0.05         | 0.05        | 845.2        | 0.88         | 0.382            |
| <b>Gender × Mind-wandering</b>      | <b>-0.19</b> | <b>0.05</b> | <b>768.2</b> | <b>-3.55</b> | <b>&lt;0.001</b> |
| Gender × Surprise                   | 0.05         | 0.05        | 737.4        | 1.01         | 0.312            |
| Gender × Wanting to understand more | 0.02         | 0.06        | 831.2        | 0.41         | 0.681            |
| Gender × Telling a story            | -0.01        | 0.05        | 848.4        | -0.28        | 0.782            |

*Notes.* The reference level for gender was male. Significant fixed effects and interactions are highlighted in bold. The model explained 68 % of the variance.

**Table S16. The linear-mixed effects model for Experiment 1b, including age as additional predictor.**

| Random effects                          |              |             |              |              |                  |
|-----------------------------------------|--------------|-------------|--------------|--------------|------------------|
|                                         | Variance     | SD          |              |              |                  |
| Participant                             | 0.1          | 0.31        |              |              |                  |
| Image                                   | 0.2          | 0.44        |              |              |                  |
| Fixed effects                           |              |             |              |              |                  |
|                                         | Estimate     | SE          | df           | t            | p                |
| Intercept                               | 0.06         | 0.57        | 413.9        | 0.10         | 0.921            |
| Age                                     | 0.01         | 0.01        | 408.6        | 0.52         | 0.606            |
| Pleasure                                | 0.15         | 0.12        | 837.5        | 1.25         | 0.213            |
| <b>Wish to continue</b>                 | <b>0.34</b>  | <b>0.10</b> | <b>853.0</b> | <b>3.20</b>  | <b>0.001</b>     |
| Feeling alive                           | 0.06         | 0.10        | 848.5        | 0.57         | 0.569            |
| <b>Universality</b>                     | <b>0.62</b>  | <b>0.11</b> | <b>765.0</b> | <b>5.87</b>  | <b>&lt;0.001</b> |
| Number of felt connections              | -0.19        | 0.11        | 734.0        | -1.76        | 0.079            |
| Longing                                 | 0.06         | 0.10        | 789.4        | 0.61         | 0.541            |
| Feeling free of desire                  | 0.01         | 0.10        | 849.6        | 0.09         | 0.925            |
| Mind-wandering                          | -0.07        | 0.10        | 822.1        | -0.71        | 0.481            |
| Surprise                                | 0.02         | 0.09        | 772.1        | 0.19         | 0.848            |
| Wanting to understand more              | -0.09        | 0.10        | 843.0        | -0.88        | 0.380            |
| Telling a story                         | 0.04         | 0.09        | 848.5        | 0.47         | 0.636            |
| Age × pleasure                          | 0.00         | 0.00        | 838.9        | -0.19        | 0.848            |
| Age × Wish to continue                  | 0.00         | 0.00        | 849.8        | -1.55        | 0.122            |
| Age × Feeling alive                     | 0.00         | 0.00        | 848.2        | -0.46        | 0.644            |
| <b>Age × Universality</b>               | <b>-0.01</b> | <b>0.00</b> | <b>682.2</b> | <b>-3.33</b> | <b>0.001</b>     |
| <b>Age × Number of felt connections</b> | <b>0.01</b>  | <b>0.00</b> | <b>755.8</b> | <b>2.39</b>  | <b>0.017</b>     |
| Age × Longing                           | 0.00         | 0.00        | 770.6        | -0.27        | 0.787            |
| Age × Feeling free of desire            | 0.00         | 0.00        | 849.6        | 0.88         | 0.381            |
| Age × Mind-wandering                    | 0.00         | 0.00        | 840.4        | 1.56         | 0.118            |
| Age × Surprise                          | 0.00         | 0.00        | 769.8        | 0.13         | 0.895            |
| Age × Wanting to understand more        | 0.00         | 0.00        | 849.9        | 1.65         | 0.100            |
| Age × Telling a story                   | 0.00         | 0.00        | 850.7        | -0.83        | 0.406            |

*Notes.* Significant fixed effects and interactions are highlighted in bold. The model explained 69 % of the variance.



**Table S17. The linear-mixed effects model for Experiment 1b, including the general beauty attitude question “How closely related are the feelings of beauty and pleasure?” as additional predictor.**

| Random effects                          |              |             |            |              |              |
|-----------------------------------------|--------------|-------------|------------|--------------|--------------|
|                                         | Variance     | <i>SD</i>   |            |              |              |
| Participant                             | 0.11         | 0.33        |            |              |              |
| Image                                   | 0.21         | 0.46        |            |              |              |
| Fixed effects                           |              |             |            |              |              |
|                                         | Estimate     | <i>SE</i>   | <i>df</i>  | <i>t</i>     | <i>p</i>     |
| Intercept                               | 0.36         | 0.73        | 506        | 0.50         | 0.621        |
| Closeness beauty pleasure (CBP)         | 0.00         | 0.12        | 506        | -0.03        | 0.978        |
| <b>Pleasure</b>                         | <b>0.45</b>  | <b>0.15</b> | <b>718</b> | <b>2.92</b>  | <b>0.004</b> |
| <b>Wish to continue</b>                 | <b>0.34</b>  | <b>0.12</b> | <b>844</b> | <b>2.73</b>  | <b>0.007</b> |
| Feeling alive                           | 0.10         | 0.14        | 840        | 0.72         | 0.473        |
| Universality                            | 0.21         | 0.12        | 460        | 1.76         | 0.079        |
| Number of felt connections              | -0.27        | 0.15        | 800        | -1.76        | 0.078        |
| Longing                                 | 0.12         | 0.13        | 772        | 0.96         | 0.339        |
| Feeling free of desire                  | 0.10         | 0.12        | 849        | 0.84         | 0.401        |
| Mind-wandering                          | -0.13        | 0.12        | 792        | -1.09        | 0.277        |
| Surprise                                | -0.08        | 0.13        | 791        | -0.57        | 0.568        |
| Wanting to understand more              | 0.14         | 0.13        | 837        | 1.06         | 0.289        |
| Telling a story                         | -0.03        | 0.11        | 852        | -0.26        | 0.798        |
| <b>CBP × pleasure</b>                   | <b>-0.06</b> | <b>0.03</b> | <b>730</b> | <b>-2.14</b> | <b>0.032</b> |
| CBP × Wish to continue                  | -0.03        | 0.02        | 845        | -1.33        | 0.182        |
| CBP × Feeling alive                     | -0.01        | 0.02        | 839        | -0.59        | 0.557        |
| CBP × Universality                      | 0.01         | 0.02        | 494        | 0.58         | 0.561        |
| <b>CBP × Number of felt connections</b> | <b>0.06</b>  | <b>0.03</b> | <b>802</b> | <b>2.22</b>  | <b>0.027</b> |
| CBP × Longing                           | -0.02        | 0.02        | 777        | -0.69        | 0.492        |
| CBP × Feeling free of desire            | 0.00         | 0.02        | 848        | 0.00         | 0.999        |
| CBP × Mind-wandering                    | 0.04         | 0.02        | 800        | 1.86         | 0.063        |
| CBP × Surprise                          | 0.02         | 0.02        | 790        | 0.76         | 0.450        |
| CBP × Wanting to understand more        | -0.01        | 0.02        | 846        | -0.56        | 0.575        |
| CBP × Telling a story                   | 0.00         | 0.02        | 849        | 0.00         | 0.998        |

*Notes.* Significant fixed effects and interactions are highlighted in bold. The model explained 69 % of the variance.

**Table S18. The linear-mixed effects model for Experiment 1b, including the general beauty attitude question “Which is greater, the beauty of art or nature?” as additional predictor.**

| Random effects                                    |              |             |              |              |              |
|---------------------------------------------------|--------------|-------------|--------------|--------------|--------------|
|                                                   | Variance     | <i>SD</i>   |              |              |              |
| Participant                                       | 0.10         | 0.32        |              |              |              |
| Image                                             | 0.23         | 0.48        |              |              |              |
| Fixed effects                                     |              |             |              |              |              |
|                                                   | Estimate     | <i>SE</i>   | <i>df</i>    | <i>t</i>     | <i>p</i>     |
| Intercept                                         | 0.66         | 0.75        | 473.7        | 0.88         | 0.382        |
| Art or nature                                     | -0.04        | 0.13        | 479.1        | -0.30        | 0.768        |
| Pleasure                                          | 0.23         | 0.15        | 772.4        | 1.51         | 0.132        |
| <b>Wish to continue</b>                           | <b>0.34</b>  | <b>0.14</b> | <b>845.1</b> | <b>2.52</b>  | <b>0.012</b> |
| Feeling alive                                     | 0.18         | 0.14        | 848.7        | 1.28         | 0.200        |
| <b>Universality</b>                               | <b>0.32</b>  | <b>0.12</b> | <b>828.3</b> | <b>2.58</b>  | <b>0.010</b> |
| <b>Number of felt connections</b>                 | <b>-0.45</b> | <b>0.15</b> | <b>774.1</b> | <b>-2.90</b> | <b>0.004</b> |
| Longing                                           | -0.03        | 0.13        | 817.5        | -0.21        | 0.836        |
| Feeling free of desire                            | 0.11         | 0.12        | 832.1        | 0.94         | 0.347        |
| Mind-wandering                                    | -0.13        | 0.12        | 545.3        | -1.07        | 0.285        |
| Surprise                                          | -0.12        | 0.12        | 612.0        | -1.05        | 0.292        |
| Wanting to understand more                        | 0.20         | 0.13        | 848.3        | 1.47         | 0.142        |
| Telling a story                                   | 0.05         | 0.11        | 788.3        | 0.49         | 0.623        |
| Art or nature × pleasure                          | -0.02        | 0.03        | 800.6        | -0.59        | 0.555        |
| Art or nature × Wish to continue                  | -0.03        | 0.02        | 846.0        | -1.18        | 0.240        |
| Art or nature × Feeling alive                     | -0.03        | 0.02        | 847.3        | -1.25        | 0.210        |
| Art or nature × Universality                      | -0.01        | 0.02        | 826.4        | -0.46        | 0.648        |
| <b>Art or nature × Number of felt connections</b> | <b>0.09</b>  | <b>0.03</b> | <b>760.3</b> | <b>3.38</b>  | <b>0.001</b> |
| Art or nature × Longing                           | 0.01         | 0.02        | 809.6        | 0.48         | 0.633        |
| Art or nature × Feeling free of desire            | 0.00         | 0.02        | 835.9        | -0.14        | 0.886        |
| Art or nature × Mind-wandering                    | 0.04         | 0.02        | 585.8        | 1.78         | 0.075        |
| Art or nature × Surprise                          | 0.02         | 0.02        | 635.4        | 1.17         | 0.245        |
| Art or nature × Wanting to understand more        | -0.02        | 0.02        | 847.7        | -0.97        | 0.332        |
| Art or nature × Telling a story                   | -0.01        | 0.02        | 813.5        | -0.68        | 0.494        |

*Notes.* The reference level for image category was the beautiful art image category. Significant fixed effects and interactions are highlighted in bold. The model explained 69 % of the variance.

**Table S19. The linear-mixed effects model for Experiment 1b, including the general beauty attitude question “The beauty of an image is...” entirely in the image (1) to entirely in the story (7) as additional predictor.**

| Random effects                                     |              |             |              |              |                  |
|----------------------------------------------------|--------------|-------------|--------------|--------------|------------------|
|                                                    | Variance     | <i>SD</i>   |              |              |                  |
| Participant                                        | 0.10         | 0.31        |              |              |                  |
| Image                                              | 0.23         | 0.48        |              |              |                  |
| Fixed effects                                      |              |             |              |              |                  |
|                                                    | Estimate     | <i>SE</i>   | <i>df</i>    | <i>t</i>     | <i>p</i>         |
| Intercept                                          | 0.19         | 0.59        | 521.1        | 0.33         | 0.742            |
| Image vs story                                     | 0.05         | 0.13        | 691.6        | 0.35         | 0.728            |
| <b>Pleasure</b>                                    | <b>0.49</b>  | <b>0.12</b> | <b>818.8</b> | <b>4.19</b>  | <b>&lt;0.001</b> |
| <b>Wish to continue</b>                            | <b>0.29</b>  | <b>0.10</b> | <b>845.4</b> | <b>2.76</b>  | <b>0.006</b>     |
| Feeling alive                                      | 0.15         | 0.10        | 852.4        | 1.56         | 0.118            |
| Universality                                       | 0.08         | 0.11        | 753.3        | 0.80         | 0.424            |
| Number of felt connections                         | -0.15        | 0.11        | 770.6        | -1.33        | 0.182            |
| Longing                                            | 0.02         | 0.10        | 633.1        | 0.18         | 0.857            |
| Feeling free of desire                             | 0.06         | 0.09        | 850.3        | 0.68         | 0.494            |
| Mind-wandering                                     | 0.13         | 0.09        | 790.0        | 1.35         | 0.178            |
| Surprise                                           | -0.14        | 0.09        | 783.4        | -1.64        | 0.101            |
| Wanting to understand more                         | -0.02        | 0.09        | 835.1        | -0.23        | 0.817            |
| Telling a story                                    | 0.05         | 0.08        | 852.7        | 0.57         | 0.569            |
| <b>Image vs story × pleasure</b>                   | <b>-0.09</b> | <b>0.03</b> | <b>839.8</b> | <b>-3.23</b> | <b>0.001</b>     |
| Image vs story × Wish to continue                  | -0.03        | 0.02        | 842.4        | -1.11        | 0.269            |
| Image vs story × Feeling alive                     | -0.04        | 0.02        | 848.2        | -1.54        | 0.123            |
| Image vs story × Universality                      | 0.05         | 0.02        | 794.6        | 1.85         | 0.065            |
| <b>Image vs story × Number of felt connections</b> | <b>0.05</b>  | <b>0.03</b> | <b>771.7</b> | <b>2.03</b>  | <b>0.043</b>     |
| Image vs story × Longing                           | 0.01         | 0.02        | 704.0        | 0.35         | 0.727            |
| Image vs story × Feeling free of desire            | 0.01         | 0.02        | 849.1        | 0.31         | 0.760            |
| Image vs story × Mind-wandering                    | -0.01        | 0.02        | 819.6        | -0.46        | 0.644            |
| Image vs story × Surprise                          | 0.04         | 0.02        | 777.9        | 1.92         | 0.056            |
| Image vs story × Wanting to understand more        | 0.02         | 0.02        | 840.0        | 0.97         | 0.334            |
| Image vs story × Telling a story                   | -0.02        | 0.02        | 845.0        | -0.83        | 0.409            |

*Notes.* Significant fixed effects and interactions are highlighted in bold. The model explained 69 % of the variance.

**Table S20. The linear-mixed effects model for Experiment 1b, including the general beauty attitude question “Are shared experiences of beauty a form of communication?” as additional predictor.**

| Random effects                             |              |             |              |              |                  |
|--------------------------------------------|--------------|-------------|--------------|--------------|------------------|
|                                            | Variance     | <i>SD</i>   |              |              |                  |
| Participant                                | 0.11         | 0.33        |              |              |                  |
| Image                                      | 0.22         | 0.47        |              |              |                  |
| Fixed effects                              |              |             |              |              |                  |
|                                            | Estimate     | <i>SE</i>   | <i>df</i>    | <i>t</i>     | <i>p</i>         |
| Intercept                                  | -0.54        | 0.75        | 559.5        | -0.72        | 0.474            |
| Communication                              | 0.15         | 0.12        | 577.1        | 1.25         | 0.213            |
| Pleasure                                   | 0.28         | 0.18        | 831.7        | 1.51         | 0.131            |
| Wish to continue                           | 0.16         | 0.15        | 848.4        | 1.10         | 0.271            |
| <b>Feeling alive</b>                       | <b>0.31</b>  | <b>0.15</b> | <b>848.6</b> | <b>2.08</b>  | <b>0.038</b>     |
| <b>Universality</b>                        | <b>0.61</b>  | <b>0.14</b> | <b>759.8</b> | <b>4.32</b>  | <b>&lt;0.001</b> |
| Number of felt connections                 | -0.01        | 0.17        | 800.8        | -0.04        | 0.971            |
| Longing                                    | -0.03        | 0.14        | 712.2        | -0.24        | 0.814            |
| Feeling free of desire                     | 0.00         | 0.15        | 786.4        | 0.01         | 0.995            |
| Mind-wandering                             | -0.07        | 0.14        | 804.2        | -0.54        | 0.591            |
| Surprise                                   | 0.01         | 0.13        | 757.4        | 0.07         | 0.944            |
| Wanting to understand more                 | -0.18        | 0.15        | 811.6        | -1.18        | 0.239            |
| Telling a story                            | 0.03         | 0.12        | 845.9        | 0.24         | 0.810            |
| Communication × pleasure                   | -0.03        | 0.03        | 823.7        | -0.81        | 0.416            |
| Communication × Wish to continue           | 0.00         | 0.03        | 847.3        | 0.11         | 0.911            |
| <b>Communication × Feeling alive</b>       | <b>-0.05</b> | <b>0.03</b> | <b>848.1</b> | <b>-2.04</b> | <b>0.041</b>     |
| <b>Communication × Universality</b>        | <b>-0.06</b> | <b>0.02</b> | <b>742.2</b> | <b>-2.42</b> | <b>0.016</b>     |
| Communication × Number of felt connections | 0.01         | 0.03        | 807.6        | 0.47         | 0.642            |
| Communication × Longing                    | 0.01         | 0.02        | 723.0        | 0.53         | 0.599            |
| Communication × Feeling free of desire     | 0.02         | 0.03        | 798.6        | 0.68         | 0.496            |
| Communication × Mind-wandering             | 0.03         | 0.02        | 811.9        | 1.11         | 0.269            |
| Communication × Surprise                   | 0.00         | 0.02        | 747.6        | 0.11         | 0.911            |
| Communication × Wanting to understand more | 0.04         | 0.03        | 824.8        | 1.68         | 0.093            |
| Communication × Telling a story            | -0.01        | 0.02        | 846.4        | -0.47        | 0.639            |

*Notes.* The reference level for image category was the beautiful art image category. Significant fixed effects and interactions are highlighted in bold. The model explained 69 % of the variance.

**Table S21. The linear-mixed effects model for Experiment 1b, including the general beauty attitude question “How much does mood affect the feeling of beauty?” as additional predictor.**

| Random effects                    |              |             |              |              |                  |
|-----------------------------------|--------------|-------------|--------------|--------------|------------------|
|                                   | Variance     | SD          |              |              |                  |
| Participant                       | 0.08         | 0.28        |              |              |                  |
| Image                             | 0.23         | 0.48        |              |              |                  |
| Fixed effects                     |              |             |              |              |                  |
|                                   | Estimate     | SE          | df           | t            | p                |
| Intercept                         | 1.03         | 0.99        | 581.6        | 1.04         | 0.299            |
| Mood                              | -0.10        | 0.16        | 586.8        | -0.66        | 0.513            |
| Pleasure                          | 0.13         | 0.19        | 815.4        | 0.69         | 0.492            |
| Wish to continue                  | -0.01        | 0.17        | 843.2        | -0.05        | 0.958            |
| Feeling alive                     | 0.23         | 0.16        | 846.6        | 1.46         | 0.145            |
| <b>Universality</b>               | <b>0.79</b>  | <b>0.14</b> | <b>765.4</b> | <b>5.55</b>  | <b>&lt;0.001</b> |
| Number of felt connections        | -0.13        | 0.19        | 729.2        | -0.66        | 0.513            |
| Longing                           | -0.14        | 0.15        | 539.7        | -0.96        | 0.335            |
| Feeling free of desire            | -0.02        | 0.15        | 841.6        | -0.12        | 0.907            |
| Mind-wandering                    | -0.09        | 0.15        | 627.6        | -0.63        | 0.526            |
| Surprise                          | -0.08        | 0.16        | 691.4        | -0.50        | 0.616            |
| Wanting to understand more        | 0.16         | 0.15        | 846.4        | 1.04         | 0.298            |
| Telling a story                   | -0.12        | 0.13        | 851.7        | -0.95        | 0.342            |
| Mood × pleasure                   | 0.00         | 0.03        | 810.0        | 0.08         | 0.940            |
| Mood × Wish to continue           | 0.03         | 0.03        | 841.2        | 1.18         | 0.238            |
| Mood × Feeling alive              | -0.04        | 0.03        | 846.9        | -1.38        | 0.167            |
| <b>Mood × Universality</b>        | <b>-0.09</b> | <b>0.02</b> | <b>754.3</b> | <b>-3.76</b> | <b>&lt;0.001</b> |
| Mood × Number of felt connections | 0.03         | 0.03        | 738.2        | 0.99         | 0.324            |
| Mood × Longing                    | 0.03         | 0.02        | 533.9        | 1.31         | 0.192            |
| Mood × Feeling free of desire     | 0.02         | 0.02        | 840.2        | 0.77         | 0.439            |
| Mood × Mind-wandering             | 0.03         | 0.02        | 646.2        | 1.18         | 0.238            |
| Mood × Surprise                   | 0.02         | 0.03        | 681.5        | 0.67         | 0.503            |
| Mood × Wanting to understand more | -0.02        | 0.02        | 848.1        | -0.65        | 0.515            |
| Mood × Telling a story            | 0.02         | 0.02        | 849.6        | 0.78         | 0.438            |

*Notes.* The reference level for image category was the beautiful art image category. Significant fixed effects and interactions are highlighted in bold. The model explained 68 % of the variance.

**Table S22. The linear-mixed effects model for Experiment 1b, including the general beauty attitude question “Can you name an object that everyone finds beautiful?” as additional predictor.**

| Random effects                     |              |             |              |              |                  |
|------------------------------------|--------------|-------------|--------------|--------------|------------------|
|                                    | Variance     | SD          |              |              |                  |
| Participant                        | 0.10         | 0.31        |              |              |                  |
| Image                              | 0.20         | 0.45        |              |              |                  |
| Fixed effects                      |              |             |              |              |                  |
|                                    | Estimate     | SE          | df           | t            | p                |
| Intercept                          | 0.48         | 0.28        | 102.6        | 1.68         | 0.096            |
| Universally beautiful object (UBO) | -0.23        | 0.31        | 598.1        | -0.74        | 0.458            |
| <b>Pleasure</b>                    | <b>0.11</b>  | <b>0.05</b> | <b>770.0</b> | <b>2.30</b>  | <b>0.022</b>     |
| Wish to continue                   | 0.06         | 0.05        | 841.5        | 1.30         | 0.193            |
| Feeling alive                      | 0.02         | 0.04        | 856.9        | 0.48         | 0.629            |
| <b>Universality</b>                | <b>0.40</b>  | <b>0.05</b> | <b>811.7</b> | <b>8.62</b>  | <b>&lt;0.001</b> |
| Number of felt connections         | 0.08         | 0.05        | 757.4        | 1.63         | 0.104            |
| Longing                            | 0.01         | 0.04        | 697.6        | 0.24         | 0.808            |
| <b>Feeling free of desire</b>      | <b>0.14</b>  | <b>0.04</b> | <b>843.4</b> | <b>3.22</b>  | <b>0.001</b>     |
| Mind-wandering                     | 0.01         | 0.04        | 726.9        | 0.17         | 0.866            |
| Surprise                           | 0.06         | 0.04        | 696.9        | 1.64         | 0.103            |
| Wanting to understand more         | 0.09         | 0.04        | 828.7        | 2.15         | 0.032            |
| Telling a story                    | -0.07        | 0.04        | 857.9        | -1.79        | 0.074            |
| UBO × pleasure                     | 0.07         | 0.07        | 786.0        | 1.05         | 0.293            |
| <b>UBO × Wish to continue</b>      | <b>0.19</b>  | <b>0.06</b> | <b>844.7</b> | <b>3.05</b>  | <b>0.002</b>     |
| UBO × Feeling alive                | 0.01         | 0.06        | 847.8        | 0.10         | 0.918            |
| <b>UBO × Universality</b>          | <b>-0.21</b> | <b>0.06</b> | <b>761.6</b> | <b>-3.69</b> | <b>&lt;0.001</b> |
| UBO × Number of felt connections   | -0.07        | 0.07        | 764.4        | -1.02        | 0.309            |
| UBO × Longing                      | 0.04         | 0.06        | 703.7        | 0.70         | 0.487            |
| UBO × Feeling free of desire       | -0.08        | 0.05        | 843.3        | -1.52        | 0.130            |
| <b>UBO × Mind-wandering</b>        | <b>0.13</b>  | <b>0.05</b> | <b>751.2</b> | <b>2.47</b>  | <b>0.014</b>     |
| UBO × Surprise                     | -0.09        | 0.05        | 713.2        | -1.82        | 0.069            |
| UBO × Wanting to understand more   | -0.04        | 0.06        | 826.5        | -0.70        | 0.484            |
| <b>UBO × Telling a story</b>       | <b>0.09</b>  | <b>0.05</b> | <b>847.4</b> | <b>1.98</b>  | <b>0.048</b>     |

*Notes.* The reference level for universal beauty was “yes”. Significant fixed effects and interactions are highlighted in bold. The model explained 69% of the variance.

### Additional models tested with combined data from Experiment 1a and 1b

The model explaining the highest proportion of variance, 75%, is described in the main article. **Tables S23-S25** list the results of all remaining tested models.

**Table S23. The linear-mixed effects model for Experiment 1 (combined data) without interactions.**

| Random effects                    |             |             |               |              |                  |
|-----------------------------------|-------------|-------------|---------------|--------------|------------------|
|                                   | Variance    | SD          |               |              |                  |
| Participant                       | 0.07        | 0.26        |               |              |                  |
| Image                             | 0.13        | 0.36        |               |              |                  |
| Fixed effects                     |             |             |               |              |                  |
|                                   | Estimate    | SE          | df            | t            | p                |
| <b>Intercept</b>                  | <b>0.34</b> | <b>0.12</b> | <b>65.1</b>   | <b>2.93</b>  | <b>0.005</b>     |
| <b>Pleasure</b>                   | <b>0.21</b> | <b>0.02</b> | <b>2583.9</b> | <b>11.04</b> | <b>&lt;0.001</b> |
| <b>Wish to continue</b>           | <b>0.20</b> | <b>0.02</b> | <b>2621.6</b> | <b>11.27</b> | <b>&lt;0.001</b> |
| <b>Feeling alive</b>              | <b>0.08</b> | <b>0.02</b> | <b>2644.8</b> | <b>4.30</b>  | <b>&lt;0.001</b> |
| <b>Universality</b>               | <b>0.23</b> | <b>0.02</b> | <b>2212.1</b> | <b>12.23</b> | <b>&lt;0.001</b> |
| <b>Number of felt connections</b> | <b>0.06</b> | <b>0.02</b> | <b>2393.3</b> | <b>3.81</b>  | <b>&lt;0.001</b> |
| <b>Longing</b>                    | <b>0.04</b> | <b>0.02</b> | <b>2133.5</b> | <b>2.38</b>  | <b>0.017</b>     |
| <b>Feeling free of desire</b>     | <b>0.07</b> | <b>0.02</b> | <b>2443.7</b> | <b>4.25</b>  | <b>&lt;0.001</b> |
| <b>Mind-wandering</b>             | <b>0.05</b> | <b>0.02</b> | <b>2439.5</b> | <b>3.42</b>  | <b>0.001</b>     |
| Surprise                          | -0.02       | 0.01        | 1882.0        | -1.13        | 0.260            |
| <b>Wanting to understand more</b> | <b>0.04</b> | <b>0.02</b> | <b>2566.6</b> | <b>2.76</b>  | <b>0.006</b>     |
| Telling a story                   | -0.01       | 0.01        | 2392.7        | -0.73        | 0.466            |

*Notes.* Significant fixed effects and interactions are highlighted in bold. The model explained 72 % of the variance.

**Table S24. The linear-mixed effects model for Experiment 1 (combined data) including gender as additional factor.**

| Random effects                      |              |             |               |              |                  |
|-------------------------------------|--------------|-------------|---------------|--------------|------------------|
|                                     | Variance     | <i>SD</i>   |               |              |                  |
| Participant                         | 0.07         | 0.26        |               |              |                  |
| Image                               | 0.12         | 0.35        |               |              |                  |
| Fixed effects                       |              |             |               |              |                  |
|                                     | Estimate     | <i>SE</i>   | <i>df</i>     | <i>t</i>     | <i>p</i>         |
| Intercept                           | 0.32         | 0.13        | 104.0         | 2.50         | 0.014            |
| Gender                              | 0.01         | 0.16        | 1068.0        | 0.08         | 0.935            |
| <b>Pleasure</b>                     | <b>0.18</b>  | <b>0.02</b> | <b>2572.0</b> | <b>7.64</b>  | <b>&lt;0.001</b> |
| <b>Wish to continue</b>             | <b>0.19</b>  | <b>0.02</b> | <b>2575.0</b> | <b>8.15</b>  | <b>&lt;0.001</b> |
| <b>Feeling alive</b>                | <b>0.12</b>  | <b>0.02</b> | <b>2603.0</b> | <b>5.40</b>  | <b>&lt;0.001</b> |
| <b>Universality</b>                 | <b>0.22</b>  | <b>0.02</b> | <b>2247.0</b> | <b>9.66</b>  | <b>&lt;0.001</b> |
| <b>Number of felt connections</b>   | <b>0.08</b>  | <b>0.02</b> | <b>2354.0</b> | <b>3.91</b>  | <b>&lt;0.001</b> |
| Longing                             | 0.03         | 0.02        | 1929.0        | 1.40         | 0.163            |
| <b>Feeling free of desire</b>       | <b>0.06</b>  | <b>0.02</b> | <b>2375.0</b> | <b>3.16</b>  | <b>0.002</b>     |
| <b>Mind-wandering</b>               | <b>0.07</b>  | <b>0.02</b> | <b>2490.0</b> | <b>3.52</b>  | <b>&lt;0.001</b> |
| Surprise                            | -0.02        | 0.02        | 1749.0        | -1.28        | 0.202            |
| Wanting to understand more          | 0.02         | 0.02        | 2493.0        | 1.23         | 0.219            |
| Telling a story                     | -0.01        | 0.02        | 2491.0        | -0.34        | 0.737            |
| Gender × pleasure                   | 0.06         | 0.04        | 2487.0        | 1.52         | 0.128            |
| Gender × Wish to continue           | 0.05         | 0.04        | 2545.0        | 1.36         | 0.173            |
| <b>Gender × Feeling alive</b>       | <b>-0.11</b> | <b>0.04</b> | <b>2582.0</b> | <b>-3.04</b> | <b>0.002</b>     |
| Gender × Universality               | 0.02         | 0.03        | 2280.0        | 0.51         | 0.609            |
| Gender × Number of felt connections | -0.05        | 0.03        | 2295.0        | -1.60        | 0.111            |
| Gender × Longing                    | 0.02         | 0.03        | 2137.0        | 0.58         | 0.561            |
| Gender × Feeling free of desire     | 0.01         | 0.03        | 2381.0        | 0.30         | 0.762            |
| Gender × Mind-wandering             | -0.03        | 0.03        | 2321.0        | -1.01        | 0.315            |
| Gender × Surprise                   | 0.02         | 0.03        | 1844.0        | 0.83         | 0.410            |
| Gender × Wanting to understand more | 0.04         | 0.03        | 2504.0        | 1.45         | 0.147            |
| Gender × Telling a story            | -0.01        | 0.03        | 2523.0        | -0.51        | 0.611            |

*Notes.* The reference level for gender was male. Significant fixed effects and interactions are highlighted in bold. The model explained 72% of the variance.



**Table S25. The linear-mixed effects model for Experiment 1 (combined data) including age as additional predictor.**

| Random effects                          |             |             |               |             |                  |
|-----------------------------------------|-------------|-------------|---------------|-------------|------------------|
|                                         | Variance    | SD          |               |             |                  |
| Participant                             | 0.06        | 0.25        |               |             |                  |
| Image                                   | 0.12        | 0.35        |               |             |                  |
| Fixed effects                           |             |             |               |             |                  |
|                                         | Estimate    | SE          | df            | t           | p                |
| Intercept                               | -0.15       | 0.29        | 670.1         | -0.53       | 0.600            |
| Age                                     | 0.01        | 0.01        | 709.8         | 1.80        | 0.072            |
| <b>Pleasure</b>                         | <b>0.31</b> | <b>0.07</b> | <b>2602.0</b> | <b>4.59</b> | <b>&lt;0.001</b> |
| <b>Wish to continue</b>                 | <b>0.31</b> | <b>0.06</b> | <b>2626.0</b> | <b>4.83</b> | <b>&lt;0.001</b> |
| Feeling alive                           | 0.05        | 0.06        | 2601.0        | 0.83        | 0.408            |
| <b>Universality</b>                     | <b>0.26</b> | <b>0.06</b> | <b>2283.0</b> | <b>4.09</b> | <b>&lt;0.001</b> |
| Number of felt connections              | -0.08       | 0.06        | 2235.0        | -1.42       | 0.156            |
| <b>Longing</b>                          | <b>0.12</b> | <b>0.06</b> | <b>2147.0</b> | <b>2.08</b> | <b>0.038</b>     |
| Feeling free of desire                  | 0.01        | 0.06        | 2344.0        | 0.16        | 0.875            |
| Mind-wandering                          | 0.10        | 0.06        | 2543.0        | 1.81        | 0.071            |
| Surprise                                | -0.08       | 0.05        | 1541.0        | -1.62       | 0.105            |
| Wanting to understand more              | 0.08        | 0.05        | 2513.0        | 1.50        | 0.134            |
| Telling a story                         | -0.09       | 0.05        | 2610.0        | -1.85       | 0.065            |
| Age × pleasure                          | 0.00        | 0.00        | 2602.0        | -1.64       | 0.101            |
| Age × Wish to continue                  | 0.00        | 0.00        | 2625.0        | -1.66       | 0.096            |
| Age × Feeling alive                     | 0.00        | 0.00        | 2608.0        | 0.35        | 0.726            |
| Age × Universality                      | 0.00        | 0.00        | 2210.0        | -0.62       | 0.534            |
| <b>Age × Number of felt connections</b> | <b>0.00</b> | <b>0.00</b> | <b>2302.0</b> | <b>2.62</b> | <b>0.009</b>     |
| Age × Longing                           | 0.00        | 0.00        | 2136.0        | -1.46       | 0.143            |
| Age × Feeling free of desire            | 0.00        | 0.00        | 2346.0        | 1.01        | 0.314            |
| Age × Mind-wandering                    | 0.00        | 0.00        | 2571.0        | -0.89       | 0.372            |
| Age × Surprise                          | 0.00        | 0.00        | 1485.0        | 1.47        | 0.143            |
| Age × Wanting to understand more        | 0.00        | 0.00        | 2551.0        | -0.65       | 0.517            |
| Age × Telling a story                   | 0.00        | 0.00        | 2622.0        | 1.75        | 0.080            |

*Notes.* Significant fixed effects and interactions are highlighted in bold. The model explained 72 % of the variance.

### **Experiment 2a & 2b: Beauty memories (USA)**

**Experiment 2a: text analysis.** For our text analysis, we first looked at the most frequently occurring words, excluding stop words and punctuation. Unsurprisingly, the most commonly used word was “beautiful” ( $n = 69$ ), followed by “experience” ( $n = 35$ ), and “could”

( $n = 28$ ). Then came “like” which was just as frequently mentioned as “beauty” ( $n = 27$ ).

Predominantly, people were describing what they visually experienced, with both “see” ( $n = 26$ ) and “saw” ( $n = 20$ ) being among the 12 most frequent words. The remaining top-12 mentioned words were related to memory recall (“one”, “time”, “went”, “remember”).

In addition to the most frequent individual words we also looked at the most frequent word combinations, i.e., bigrams. Again, the most frequent reflected the task (“beauty experience”  $n = 9$ ). The next most common “could see” ( $n = 8$ ) confirms the dominance of visual experiences. Third, participants seemed to frequently recall special “first time” events ( $n = 7$ ).

Going beyond the count of word frequencies, we used the *empath client* to analyze which lexical categories are overrepresented in our beauty descriptions compared to a standard text corpus. We find that the top ten lexical categories in the beauty memory descriptions were, in order: beauty, attractive, feminine, weather, beach, vacation, children, family, love, and water.

**Experiment 2b: text analysis.** The text analysis of the second US-American sample’s memory descriptions revealed a highly similar pattern to the one obtained for the first sample. The most commonly used word was, again, “beautiful” ( $n = 65$ ), followed by “beauty” ( $n = 28$ ), and “felt” ( $n = 27$ ). Then came “time” which was just as frequently mentioned as “day” ( $n = 27$ ). “Like” was frequently used, too ( $n = 25$ ). People used words related to visual nature experiences “see” ( $n = 19$ ), “nature” ( $n = 20$ ), and “sun” ( $n = 18$ ), being among the most frequently used words. This underlines the results obtained so far and is in line with people’s general beliefs about beauty (see below *People’s explicit beliefs about beauty* in the main article). the most frequently occurring bigrams further confirm the predominance of beauty, experiential, and nature themes: “first time” ( $n = 11$ ), “years ago” ( $n = 8$ ), “beautiful experience” ( $n = 5$ ), “ever seen” ( $n = 5$ ), “looked like”, and “sun shining” ( $n = 4$ ). Of note, as in the first US sample and the

UK, US-Americans frequently mentioned “first time” experiences, a pattern that we did not find in India.

The *empath* analyses on the second US-American sample’s memory descriptions brought up similar if not identical themes compared to our first sample. The top 10 were beauty, attractive, feminine, weather, beach, vacation, love, plant, positive emotion, and traveling.

**Experiment 2b: Perceptual task.** The circle size ratings were mostly unrelated to aesthetic judgments. Out of 16 ratings, one correlated slightly positive, longing,  $r = 0.21$ , 95% CI [0.00, 0.40], and one slightly negative, beauty,  $r = -0.25$ , [-0.43, -0.04], with the circle size difference rating. Therefore, general biases can again not explain the overall rating pattern.

## Comparison between Experiment 2a & 2b

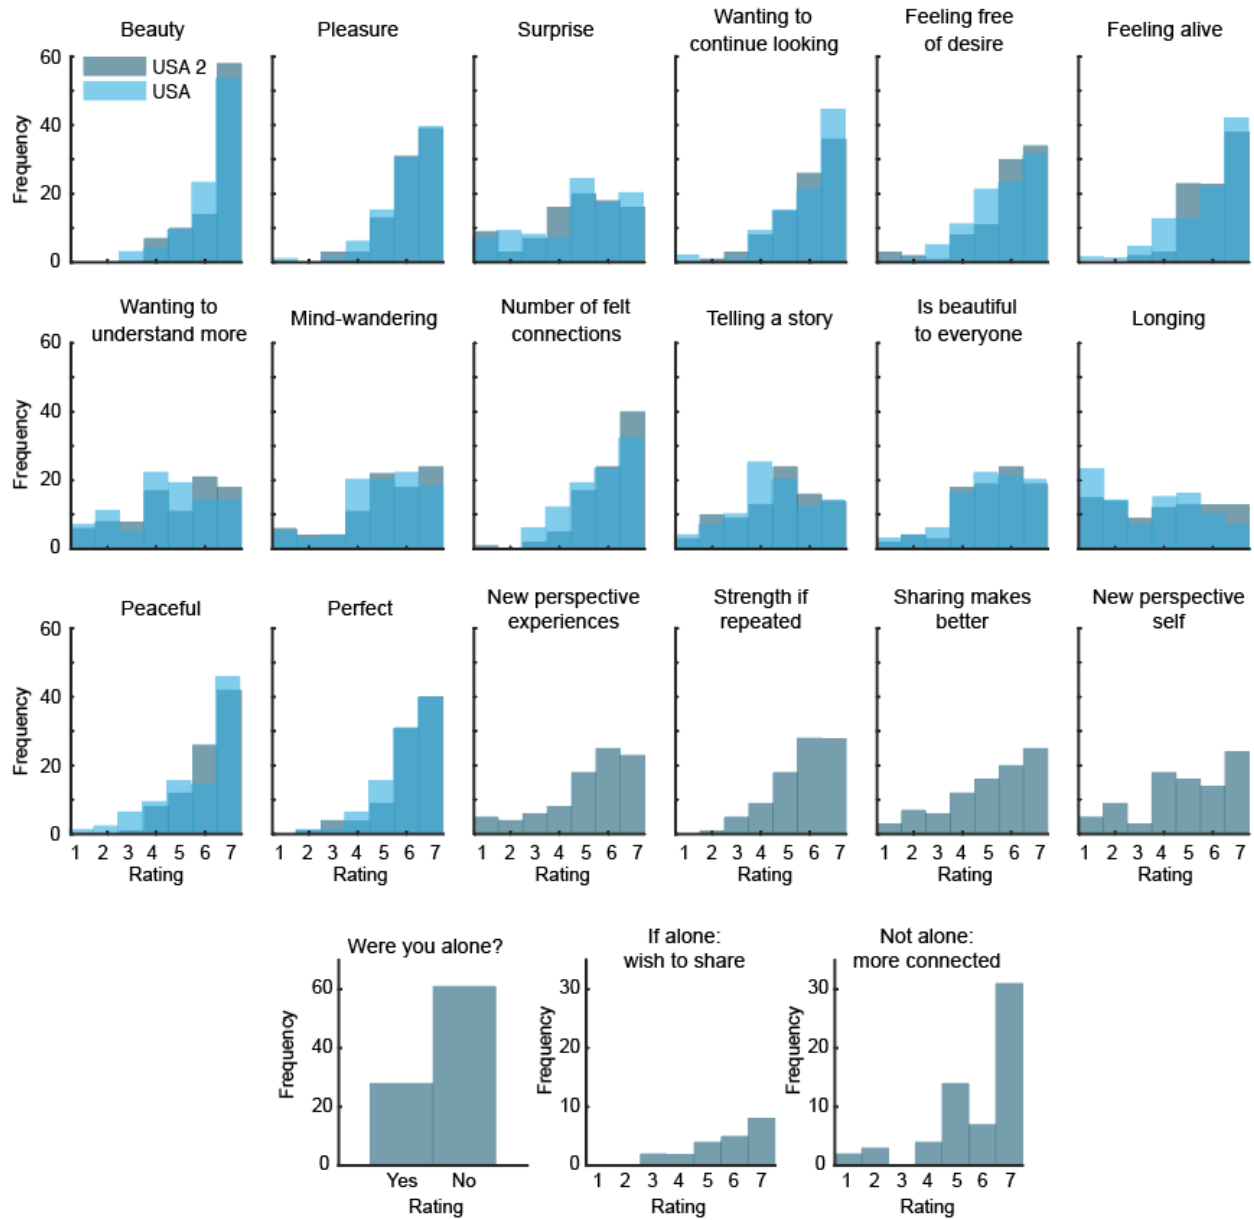

*Figure S2.* Histograms of ratings for beauty memories from the first US-American sample (light blue; Experiment 2a) and the second US-American sample (dark blue; Experiment 2b). Note that data for the last seven displayed ratings was collected from the second sample only. None of the average ratings differed between samples, all  $p \geq 0.063$ .

### **Additional comparisons between Experiment 1 and 2**

We report comparisons between ratings correlated with beauty in the main manuscript. Here, we report differences along the remaining six dimensions. Ratings of feeling alive were higher for remembered beauty,  $M = 6.33$ , compared to immediate beauty,  $M = 5.72$ ,  $t(198) = 4.94$ ,  $p < 0.001$ . Reported longing was greater for immediate beauty,  $M = 5.01$ , compared to remembered beauty,  $M = 3.67$ ,  $t(145.16) = 5.83$ ,  $p < 0.001$ . Ratings of surprise were higher for remembered beauty,  $M = 5.01$ , compared to immediate beauty,  $M = 3.84$ ,  $t(188.19) = 5.65$ ,  $p < 0.001$ . Ratings of wanting to understand the experience more were higher for immediate beauty,  $M = 5.37$ , compared to remembered beauty,  $M = 4.76$ ,  $t(154.98) = 2.96$ ,  $p = 0.004$ . Ratings of mind wandering and of how much the experience tells a story did not differ between remembered and immediate beauty, both  $p \leq 0.101$ .

### **Experiment 3a: Beauty memories in the UK**

Participants from the US and the UK did not differ in their average ratings of beauty, Wish to continue the experience, feeling alive, and longing. The overall distribution of their responses was also similar, as illustrated in **Figure S3**. However, participants from the UK did give higher ratings on 10 out of 14 rating scales (see **Figure S3**).

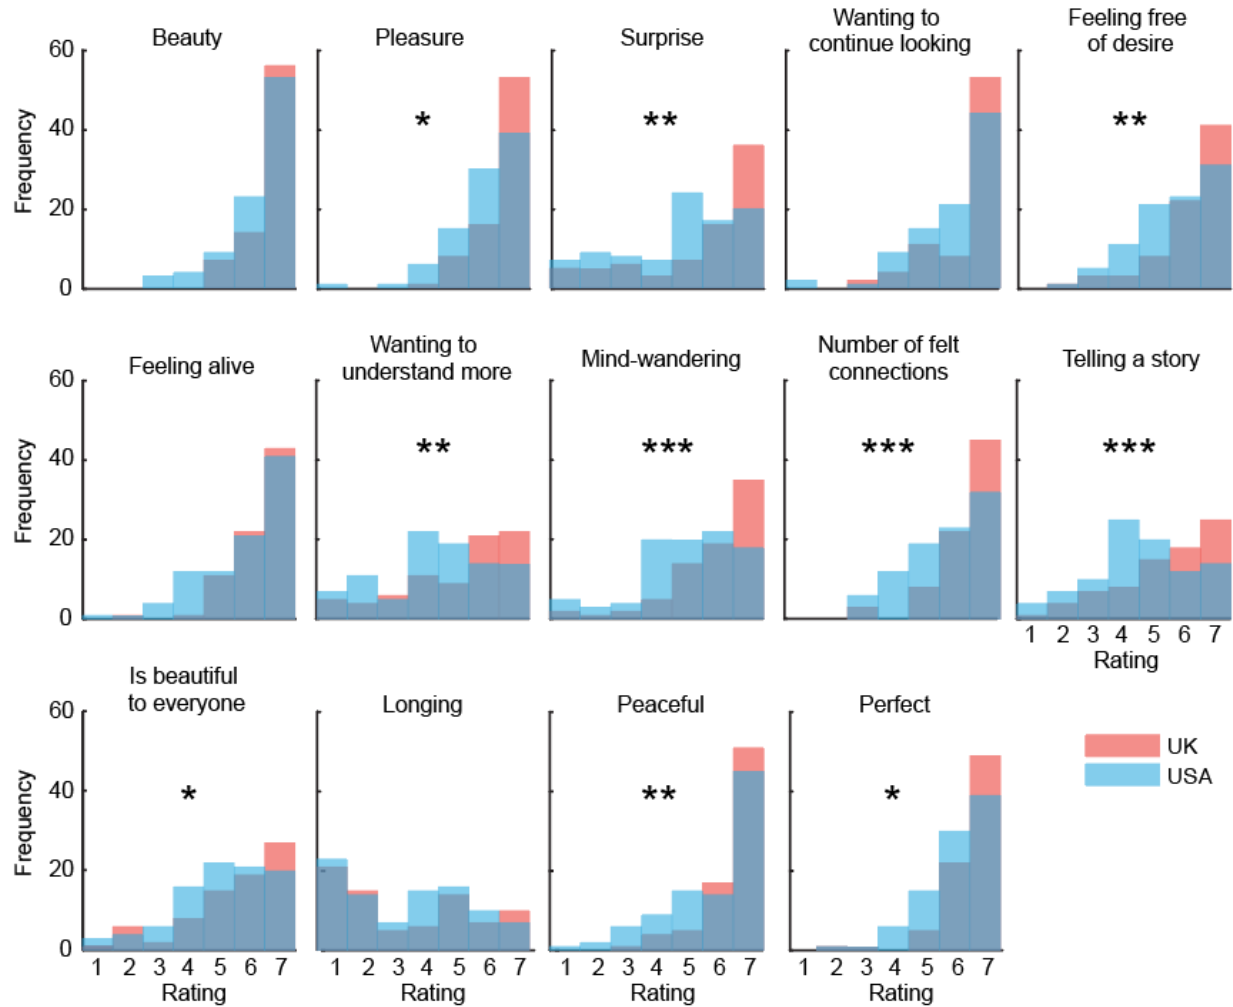

**Figure S3.** Histograms of ratings for beauty memories receiving maximum beauty ratings by US American (blue; Experiment 2a) and British participants (red; Experiment 3a). \* $p < 0.05$ , \*\* $p < 0.01$ , \*\*\* $p < 0.001$ , according to two-sided t-tests.

**Text analysis.** The most frequently occurring words in the descriptions of beauty experiences of UK participants were: “day” ( $n = 42$ ), “beautiful” ( $n = 38$ ), “time” ( $n = 31$ ), “could” ( $n = 30$ ), “like” ( $n = 28$ ), “see” ( $n = 26$ ), “felt” ( $n = 23$ ), and “smell” ( $n = 21$ ).

The most frequent bigrams for UK beauty memories were: “first time” ( $n = 11$ ), “could see” ( $n = 11$ ), “felt like” ( $n = 4$ ), “could feel” ( $n = 4$ ), “summers day” ( $n = 3$ ), and “could hear”, ( $n = 3$ ). Thus, as opposed to US participants, people in the UK were less likely to tag the

memory as beauty or beautiful experience but they exhibited the same proclivity to describe how they felt and what they saw.

The lexical analyses with *empath* revealed a large overlap in the top ten sentiments between US and UK, namely: beauty, attractive, weather, beach, feminine, children, water, and vacation. The theme party (ranking 18 out of 195 total sentiments in the US) and friends (ranking 20 in the US) were in the top ten in the UK but not the US, whereas the themes family (ranking 15 in the UK) and love (ranking 16 in the UK) appeared there in the US but not the UK.

### **Experiment 3b: Beauty memories in India**

Participants from the US and the India did not differ in their average ratings of beauty, pleasure, feeling free of desire, and peacefulness. The overall distribution of their responses was also similar, as illustrated in **Figure S4**. However, participants from India did give higher ratings on 9 out of 14 rating scales (see **Figure S4**).

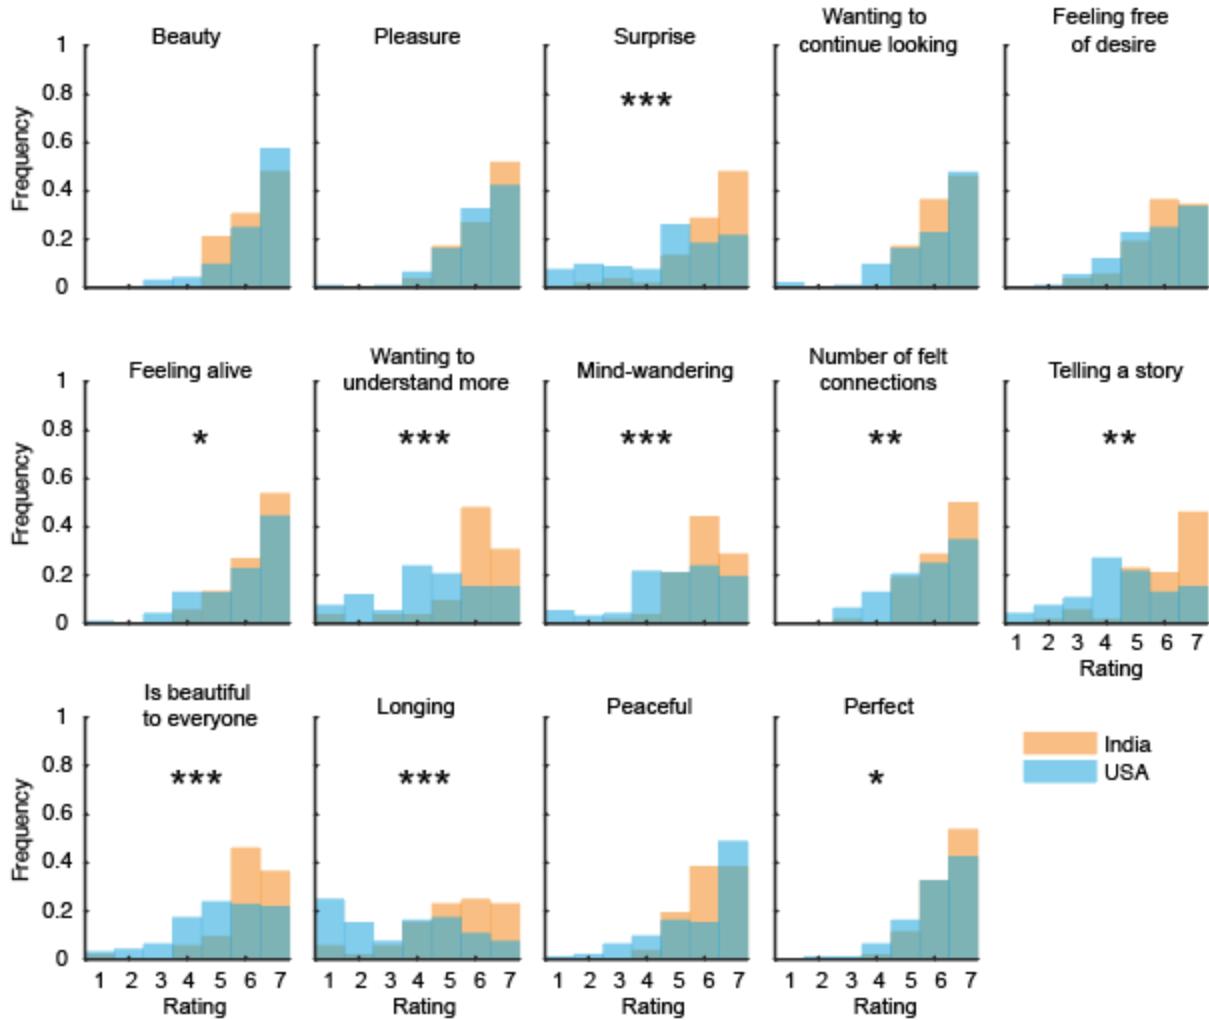

Figure S4. Histograms of ratings for beauty memories receiving maximum beauty ratings by US American (blue; Experiment 2a) and Indian participants (orange; Experiment 3b).  $*p < 0.05$ ,  $**p < 0.01$ ,  $***p < 0.001$  according to two-sided t-tests.

**Perceptual task.** The additional perception task of rating the magnitude of size difference between two circles served as an independent assessment of biases in the rating scale use. Participants had no difficulty judging which circle was bigger (50 out of 52 participants answered correct). Only one out of 14 aesthetic ratings correlated with the circle size rating, i.e., surprise,  $r = 0.50$ , 95% CI [0.26, 0.68]). Thus, participants' ratings cannot be attributed to a generally biased use of the rating scales.



**Text analysis.** The most frequently occurring words in the descriptions of beauty experiences of participants in India were: “beautiful” ( $n=33$ ), “felt” ( $n=23$ ), “feel” ( $n=21$ ), “day” ( $n=21$ ), “beauty” ( $n=21$ ), “time” ( $n=21$ ), “like” ( $n=20$ ), and “experience” ( $n=20$ ).

The most frequent bigrams for UK beauty memories were: “beauty experience” ( $n=7$ ), “years back” ( $n=6$ ), “felt like” ( $n=5$ ), “beautiful experience” ( $n=5$ ), “back went” ( $n=3$ ), “beauty life” ( $n=3$ ), “years old” ( $n=3$ ), “like heaven” ( $n=3$ ), and “one day”, ( $n=3$ ).

The lexical analyses with *empath* revealed a considerable overlap in the top ten sentiments between US and India, namely: beauty, attractive, feminine, and love. The theme positive emotion (ranking 24 out of 195 total sentiments in the US), optimism (ranking 32 in the US), celebration (ranking 28 in the US), and contentment (ranking 48 in the US) were in the top ten in India but not the US. In contrast, the themes weather (ranking 18 in India), beach (ranking 36 in India), vacation (ranking 13 in India), children (ranking 19 in India), family (ranking 20 in India), and water (ranking 68 in India) appeared there in the US but not India.

## **Additional experiment: comparing beauty and joy memories**

### **Methods**

**Participants.** Of the 100 recruited participants, 99 completed the survey. Based on the written memory descriptions provided, we excluded nine participants (7 men, 2 women) due to apparent non-compliance. Of the remaining 90 participants, 58 were male, 31 female, and one preferred not to disclose their gender. Their age ranged from 20 to 71 with a mean of 36.6 years ( $SD = 11.5$ ).

**Procedures.** The procedures were identical to Experiment 3 except for replacing the word “beauty” with “joy”. However, participants still rated how much beauty they felt during the experience.

**Analyses.** We used the same analyses as for Experiment 3.

### **Results**

Average ratings for beauty versus joy memories differed in two aspects: Joy memories were accompanied by a greater feeling of being alive,  $M = 6.20$ , than beauty memories,  $M = 5.17$ ,  $p = 0.001$ . Plus, people felt more strongly that their joy experience is joyful to everyone,  $M = 4.04$ , than they felt that their beauty experience is beautiful to everyone,  $M = 3.57$ ,  $p = 0.013$ . Ratings of beauty and joy memories did not differ along any other tested dimension, all  $p \geq 0.122$ .

The most frequently occurring words in the descriptions of joy experiences were related to task and recall: “time” ( $n = 58$ ), “first” ( $n = 47$ ), “day” ( $n = 38$ ), “went” ( $n = 34$ ), “felt”

( $n = 34$ ), and “joy” ( $n = 34$ ). Next came “happy” ( $n = 29$ ), and “see” ( $n = 27$ ), again showing that people mostly described a visual experience, just like they did for beauty. Notably, people also frequently mentioned “beautiful” ( $n = 22$ ) when describing their experiences of joy.

The most frequent bigrams for joy memories were: “first time” ( $n = 23$ ), “intense joy” ( $n = 9$ ), “felt intense” ( $n = 7$ ), followed by “best friend” ( $n = 6$ ) and “daughter born” ( $n = 5$ ). Thus, it seems, when people are asked about intense joy experiences, they recall special first-time events more so than when they think about a beauty experience. A more frequent connection with being with other people also seems apparent and was confirmed by the lexical analyses with *empath*. The top ten *empath client* categories for joy were: positive emotion, family, optimism, children, love, friends, party, celebration, childish, wedding.

Overall, beauty and joy experiences seem to share a large portion of their characteristics. This should not come as a surprise given that many joy experiences were also rated to be beautiful. Text analyses, however, revealed that different themes dominate people’s memories when asking for joy vs. pleasure. While beauty memories often occur in the context of nature, joy memories seem to be more social in nature and frequently involve family and friends.

## References

- Denham, A. E. (Ed.) (2012) *Plato on Art and Beauty*. New York, NY: Palgrave MacMillan.
- Halliwell, S. (1986). *Aristotle's Poetics*. Chapel Hill, NC: University of North Carolina Press.
- Menninghaus, W., Wagner, V., Kegel, V., Knoop, C. A., & Schlotz, W. (2019). Beauty, elegance, grace, and sexiness compared. *PLOS ONE*, 14(6), e0218728.
- Nuzzo, A. (2005). *Kant and the Unity of Reason*. West Lafayette, IN: Purdue University Press.
- Nuzzo, A. (2006). Hegel's 'Aesthetics' as Theory of Absolute Spirit. *Internationales Jahrbuch des Deutschen Idealismus/International Yearbook of German Idealism*, 4, 291-310
- Taylor, J. (2008). *Hume*. In: Hume on Beauty and Virtue. Radcliff, E. (Ed.). Oxford: Blackwell.
